1                   **Determinants of trafficking, conduction, and disease within a K<sup>+</sup> channel**  
2                   **revealed through multiparametric deep mutational scanning**

3  
4 Short Title: Multiparametric Deep Mutational Scanning in the Inward Rectifier Kir2.1

5  
6 Authors: Willow Coyote-Maestas<sup>1#</sup>, David Nedrud<sup>1</sup>, Yungui He<sup>2</sup>, Daniel Schmidt<sup>2§</sup>

7  
8 Affiliations: <sup>1</sup>Department of Biochemistry, Molecular Biology & Biophysics, University of  
9 Minnesota, Minneapolis, MN, 55455, USA; <sup>2</sup> Department of Genetics, Cell Biology &  
10 Development, University of Minnesota, Minneapolis, MN, 55455, USA

11  
12 #Present address: Department of Bioengineering and Therapeutic Science and Quantitative  
13 Biosciences Institute, University of California, San Francisco, San Francisco, CA, 94158

14  
15 §Correspondence and requests for materials should be addressed to D.S. (email:  
16 schmida@umn.edu)

17  
18 **Abstract:**

19 A longstanding goal in protein science and clinical genetics is to develop quantitative models of  
20 sequence, structure, and function relationships and delineate the mechanisms by which mutations  
21 cause disease. Deep Mutational Scanning (DMS) is a promising strategy to map how amino acids  
22 contribute to protein structure and function and to advance clinical variant interpretation. Here, we  
23 introduce 7,429 single residue missense mutation into the Inward Rectifier K<sup>+</sup> channel Kir2.1 and  
24 determine how this affects folding, assembly, and trafficking, as well as regulation by allosteric  
25 ligands and ion conduction. Our data provides high-resolution information on a cotranslationally-  
26 folded biogenic unit, trafficking and quality control signals, and segregated roles of different  
27 structural elements in fold-stability and function. We show that Kir2.1 trafficking mutants are  
28 underrepresented in variant effect databases, which has implications for clinical practice. By  
29 comparing fitness scores with expert-reviewed variant effects, we can predict the pathogenicity  
30 of ‘variants of unknown significance’ and disease mechanisms of know pathogenic mutations.  
31 Our study in Kir2.1 provides a blueprint for how multiparametric DMS can help us understand the  
32 mechanistic basis of genetic disorders and the structure-function relationships of proteins.

33

## 34 Introduction

35 Inward rectifier K<sup>+</sup> (Kir) play a central role in physiology by setting, maintaining, and regulating a  
36 cell's resting membrane potential <sup>1</sup>. Misregulated Kir cause neurological disorders (alcohol and  
37 opiate addiction<sup>2-4</sup>, Down's syndrome <sup>5</sup>, epilepsy <sup>6</sup>, Parkinsons <sup>7</sup>), cardiac disorders (Long QT  
38 syndrome <sup>8</sup>), hereditary renal diseases<sup>9</sup>, and diabetes <sup>10</sup>.

39

40 While some mechanisms that underlie disease-causing Kir variants involve aberrant function  
41 (gating, ion permeation, ligand binding <sup>11</sup>) or transcript processing <sup>12</sup>, disease-causing variants  
42 are often linked to trafficking defects. For example, over half the missense mutations investigated  
43 in Kir1.1 (ROMK1) affected surface expression, often caused by proteosomal degradation of  
44 folding-deficient or mistrafficked channels <sup>13,14</sup>. A comparison of mutation hotspots in the Kir C-  
45 terminal domain (CTD) revealed that ~60% of variants could be linked to impaired surface  
46 expression <sup>15,16</sup>. Many mutations linked to neonatal diabetes reduced Kir6.2 surface expression  
47 to varying degrees <sup>17</sup>. Beyond known trafficking signals (e.g., ER and Golgi-export signal  
48 sequences <sup>18-23</sup>), mutations along the entire Kir primary sequence can disrupt surface expression  
49 <sup>16</sup>. Several additional factors control surface expression, such as protein stability, interactions with  
50 trafficking partners, and complexes that stabilize channels in the membrane <sup>20,24,25</sup>.

51

52 The apparent prevalence of Kir trafficking phenotypes has a significant caveat: phenotypes are  
53 experimentally determined for a small fraction of possible or clinically observed variants. Of the  
54 8,113 possible missense mutations for KCNJ2/Kir2.1 only 163 are represented in ClinVar— a  
55 database of clinically observed variation and phenotypes <sup>26</sup> (**Fig. 1A, Supplementary Fig. 1**).  
56 Most studies focus on common natural variants observed in human genomes or exomes. Rare  
57 genetic variants vastly outnumber common variants <sup>27</sup> and are implicated in a substantial portion  
58 of complex human disease <sup>28</sup>. Rarity means that clinical significance (benign or pathogenic) of  
59 most variants cannot be established using genome-wide association studies due to low statistical  
60 power for calling pathogenic variants. For KCNJ2/Kir2.1 ClinVar reports 144 missense mutations,  
61 but most (72%) have “uncertain significance” or conflicting or no interpretation (**Fig. 1A**).  
62 Computational algorithms (PolyPhen-2 <sup>29</sup>, SIFT <sup>30</sup>, EVE <sup>31</sup> etc.) are currently filling this gap by  
63 predicting the consequence of mutations. However, computational approaches work best in  
64 conserved regions of genes and cannot predict mechanism of pathogenicity.

65

66 Despite a central role for Kir trafficking and function in disease etiology, there are no large-scale  
67 studies that comprehensively study sequence determinants of  $K_{IR}$  trafficking and function.  
68 Previous studies focused on a small subset of common natural variants, while systematic variation  
69 is needed for a global picture of Kir trafficking and function. Beyond explaining disease, large-  
70 scale mutational studies can reveal intrinsic properties of proteins <sup>32-34</sup>, determine protein  
71 structures <sup>35</sup>, and inform mechanistic models of protein structure function relationships <sup>36</sup>.

72  
73 Here, we combine programmable mutagenesis library generation with multi-parametric  
74 sequencing-based assays for surface expression and function of Kir2.1. Our data reveal distinct  
75 determinants for Kir trafficking, folding, tetramerization, and function. The phenotype of most  
76 clinically observed variants can be explained by impacting function, which may be related to the  
77 essential role of Kir2.1 in human physiology. We also find further support for the hypothesis that  
78 a hierarchical organization of ion channels structure balances stability and flexibility for folding  
79 and function <sup>34</sup>.

80  
81 **A multi-parametric deep mutational scan of kir2.1**

82 For Kir2.1 to fulfill its roles in cellular physiology, it must be ER targeted, folded, tetramerized, and  
83 surface trafficked (**Fig. 1B**). Once trafficked to the cell surface, Kir2.1 must be sensitive to  
84 Phosphatidylinositol 4,5-bisphosphate ( $PIP_2$ ) <sup>1,37</sup>, undergo gating associated conformational  
85 transitions (pore opening and closing), and selectively conduct  $K^+$ .

86  
87 To probe how Kir2.1 mutations affect these processes, we use a programmable deep  
88 mutagenesis approach (SPINE <sup>38,39</sup>) and mutated residues 2-392 of mouse Kir2.1 (Uniprot  
89 P35561) to every other amino acid (**Fig. 1C**). We included synonymous mutations in 20 Kir2.1  
90 positions as an internal standard to determine wildtype fitness. From this DMS library, we  
91 generated a stable single copy library cell line using BxB1-mediated recombination <sup>40</sup> for stringent  
92 genotype-phenotype linkage. Endogenous channel currents in HEK293 are negligible when  
93 compared to those of exogenous channel driven from a strong constitutive promoter (CAG) <sup>41</sup>.

94  
95 Since mutations can affect any of the abovementioned processes, multi-parametric assessment  
96 of phenotypes is required to develop a comprehensive mechanistic understanding of Kir2.1  
97 variation. We focused on separating a mutations effect on secretion, folding, and trafficking  
98 ('surface expression') and allosteric regulation and ion conductance ('function'). Considering the

99 library size of variants (391x19 = 7,429 variants), assays that assess surface-expression and  
100 function must be high-throughput. Cell-based assays coupled to fluorescently activated cell  
101 sorting that can separate cell population (and the genotypes encoding in population) based on a  
102 phenotype reported by fluorescent reporters are immensely flexible.

103

104 Mutations that interfere with secretion, folding, or trafficking will cause reduced Kir2.1 surface  
105 expression <sup>42-44</sup>. To measure Kir2.1 surface expression in cells we inserted an epitope tag into  
106 the extracellular loop (T115 <sup>45</sup>). Cells with surface trafficked variants can be separated from poorly  
107 expressed variants based on antibody-labeling and fluorescence-activated cell sorting (FACS)  
108 (**Supplementary Fig. 2**). Phenotypes can be linked to genotype by NGS. We've extensively used  
109 this method in FACS-based genotype-phenotype assays <sup>34,38,46</sup>.

110

111 Functional Kir2.1 hyperpolarizes HEK293 cells by driving the resting membrane potential (RMP)  
112 towards the reversal potential of K<sup>+</sup> (-80mV) while non-functional Kir2.1 variants do not affect the  
113 RMP (-35mV). We can measure RMP with voltage sensitive dyes, such as the FLIPR Blue, a  
114 concept that we and others demonstrated in optical Kir functional assays <sup>46,47</sup>. Changes in  
115 membrane voltage alter dye membrane partitioning, and therefore extinction coefficient and  
116 fluorescence. Hyperpolarized cells expressing functional Kir2.1 can be separated from more  
117 depolarized cells expressing non-functional Kir2.1 by FACS using FLIPR dye fluorescence  
118 (**Supplementary Fig. 3**). As with surface expression, phenotype can be linked to genotype by  
119 NGS.

120

## 121 **A global view of trafficking determinants**

122 To learn how amino acids contribute to and mutations alter Kir2.1 trafficking and folding, we sorted  
123 and sequenced the Kir2.1 DMS library based on surface expression by FACS-seq. Surface  
124 trafficking fitness was determined for 6,898 Kir2.1 variants (93%). Biological replicates for  
125 subpools were highly correlated (Pearson correlations 0.85-0.94, **Supplementary Fig. 4**) and  
126 shows read depth is excellent (greater than 30-fold at most positions, **Supplementary Fig. 5**;  
127 **Supplementary Table 1A**). Surface expression fitness scores and standard errors were  
128 calculated using Enrich2 <sup>48</sup>. Enrich2 calculates log enrichment by fitting a weighted regression  
129 based on changes in mutation frequency across samples within an experiment. Median fitness  
130 error relative to measurement range was low (7.5%) in the surface expression assay based on  
131 synonymous mutation standard deviations (**Fig. 2A, Supplementary Fig. 6**). Surface fitness

132 follows a bimodal distribution with one population of mutations centered at wildtype fitness and  
133 the other population strongly decreasing surface expression (**Fig. 2A**).

134  
135 As expected, mutations are highly deleterious within the Flag-tag used for surface labeling and  
136 known trafficking signals (**Fig. 2B**). Substituting aromatic residues with charged residues strongly  
137 decreases surface expression within the <sup>81</sup>WRWMLLLL<sup>F88</sup> motif that mediate interaction with  
138 Caveolin-3 <sup>49</sup>. Glutamates within the di-acidic ER export signal, <sup>382</sup>FCYENE<sup>387</sup> <sup>50</sup>, are quite  
139 sensitive to mutations with the second glutamate being far more sensitive. Interestingly,  
140 negatively charged mutations, N386E or N386D, between the di-acidic motif increase surface  
141 expression.

142  
143 A Golgi export signal comprised of two residues patches at Kir2.1's N- and C-termini interacts  
144 with the AP1 adaptin complex to target Kir2.1 to clathrin-coated vesicles for Golgi to plasma  
145 membrane trafficking <sup>25</sup>. Others have used alanine mutagenesis screens to identify sequence  
146 determinants for Golgi export. First, Ma et al. <sup>25</sup> defined the minimal signal motif comprised of  
147 hydrophobic residues (I321, W323, Y316) and a juxtaposed electrostatic interaction between R46  
148 and E327. Later, Li et al. <sup>18</sup> included salt bridges between basic residues in the N-terminus (R44,  
149 R46, K50) and C-terminus (E3201, E327), and hydrophobic residues (F203, L239, I240, F300).  
150 This structured trafficking signal is formed when the CTD has folded correctly to include a  
151 hydrophobic cleft, an adjacent cluster of basic residues, and a network of interactions between  
152 termini and adjacent subunits. Ma et al. suggested this structured trafficking signal predisposes  
153 Golgi exit on correct protein conformation; our comprehensive mutagenesis suggests this quality  
154 control mechanism may extend beyond previously identified sequences. It appears to involve all  
155 core beta sheet in the CTD ( $\beta$ D1,  $\beta$ H,  $\beta$ I,  $\beta$ J,  $\beta$ K,  $\beta$ B2,  $\beta$ C,  $\beta$ G) and helices  $\alpha$ G and  $\alpha$ F (**Fig.**  
156 **2B,C**). Across CTD secondary structure elements, we find a distributed network of residues that,  
157 when mutated, result in reduced surface expression (**Fig. 2D**). Changes to the packing of the  
158 hydrophobic core of the CTD will likely impact the Golgi export motif orientation. We hypothesize  
159 that the Golgi export signal is a reporter for folding of the entire CTD. Several lines of evidence  
160 support this hypothesis: IgG-like domains are a beta sheet sandwich with conserved hydrophobic  
161 residues at sheet interfaces that are crucial for fold stability <sup>51,52</sup>, computational mutagenesis in  
162 Kir1.1(ROMK1) showed these residues are crucial for fold stability, and experimental  
163 mutagenesis found mutations strongly reduces inward rectifier surface expression <sup>15,53</sup>. Residues  
164 in this network belong to the same monomer; disrupting interactions between residues belonging

165 to neighboring monomers (e.g., carbon- $\delta$  and  $\delta$ - $\delta$  interactions between F45, L246, Y338; **Fig.**  
166 **2B,E**) do not uniformly reduce surface expression. Although Kir are presumably already  
167 assembled into tetramers<sup>54</sup>, our data suggests the conformational checkpoint for Golgi export  
168 requires properly folded monomers not correctly assembled tetramers.

169  
170 Sites enriched for beneficial or deleterious substitutions could point to additional mechanisms for  
171 Kir2.1 trafficking control. Along those lines, we observe that substitution of N- and C terminal  
172 residues (G2–G31, S377-S381) with polar mutations have neutral trafficking phenotypes, while  
173 aromatic or hydrophobic mutations tend to decrease surface expression. While we do not know  
174 the underlying mechanism, our data suggests disordered N- and C-termini are important in  
175 targeting Kir2.1 to the cell surface.

176  
177 Mutations along  $\beta$ B2(M211–K215),  $\beta$ DE(S242–P252),  $\beta$ K(R333, P336),  $\beta$ L(F339),  $\beta$ M(Y345),  
178  $\beta$ N(Y366), and  $\alpha$ F helix(K372–L376) tend to improve surface-trafficking above WT especially  
179 when aromatic residues are replaced with any non-aromatic amino acids (**Fig. 3A**, t test p-value  
180 0.017). These sites form a patch on the outer face of the CTD domain where two subunits  
181 interdigitate ( $\beta$ DE from one subunit, the remaining elements from another subunit; **Fig. 3B**). In  
182 this region beneficial mutations have no clear physicochemical preferences beyond non-  
183 aromatics. While no known trafficking signal matches, aromatic residues are often binding  
184 interfaces<sup>49,55</sup>. Perhaps mutations alter trafficking patterns by disrupting protein interactions (e.g.,  
185 reduce ER retention, reduce forwarding to lysosomal recycling).

186  
187 The agreement with earlier trafficking studies in Kir2.1 shows that our high-throughput surface  
188 expression assay works. This allows us to establish a global view of sequence/trafficking  
189 relationships in Kir2.1. Comprehensive mutagenesis allows us to validate and fill in the gaps on  
190 existing models of channel trafficking<sup>18,25</sup> while discovering new potential trafficking determinants.

191

## 192 **A cotranslationally-folded biogenic unit in Kir2.1**

193 By examining structured regions sensitive to mutations, we identify determinants of Kir2.1 folding.  
194 In the pore domain, we find the lower halves of M1 and M2 are surprisingly tolerant to mutation,  
195 in particular residues whose sidechains project towards the pore cavity. At the base of the pore  
196 domain, mutations are highly deleterious within a cluster of hydrophobic residues (W81, L85, I178,  
197 F182, I187, M191) that form inter-monomer interactions between M1 and M2 helices. The top of

198 the pore domain—a region comprised the upper halves of M1, M2, pore helix, and selectivity filter—  
199 is extremely intolerant to substitutions. This includes the M2-pore helix loop (e.g., H110–E133),  
200 whose amino acid sidechains contribute to tight packing centered around a hydrophobic pocket  
201 formed by F103 (M1), F143 (pore helix), V169 (M2), and V131 M1-pore helix loop (**Fig. 3C**). The  
202 same region contains two highly conserved cysteines (C130, C162) that form a disulfide bond  
203 which is critical for folding, not function (K<sup>+</sup> conductance)<sup>56,57,57,58</sup>. Others found P156, at M2's  
204 apex, is essential for efficient surface trafficking in Kir2.2<sup>59</sup>. In agreement with folding critical roles,  
205 all substitutions in these positions are deleterious to surface expression.

206  
207 Glycines in the selectivity filter (<sup>147</sup>IQTTIGYG<sup>154</sup> in Kir2.1; conserved residues are underlined),  
208 which are absolutely conserved in all K<sup>+</sup> channels, are immutable. Because glycine is achiral, it is  
209 the only canonical amino acid that can satisfy the unusual conformation of the selectivity filter  
210 main chain, which alternates between left-handed and right-handed  $\alpha$ -helical dihedral angles<sup>60</sup>.  
211 Substitutions of either T150 (which occupies unfavorable backbone torsion angle conformation in  
212 the Kir2.2. crystal structure<sup>37,56</sup>) or Y153 (which forms  $\pi$ - $\pi$  interaction to a neighboring subunit)  
213 in the selectivity filter with glycine significantly increase surface expression. This suggests the  
214 peculiar conformational requirements of the selectivity filter are a constraint in channel biogenesis.

215  
216 Based on the extreme mutational sensitivity, high contact density of side chain packing in the  
217 Kir2.2 crystal structure, and known disulfide-mediated fold stabilization, we propose that the top  
218 halves of M1 & M2, pore helix, and the M2-pore helix loop promote tertiary structure formation  
219 within nascent Kir2.1 monomers (perhaps in the ER translocon) to establish correct topology and  
220 promote membrane insertion. This may be a general feature of K<sup>+</sup> channel folding, as a similar  
221 “cotranslationally folded biogenic unit” was proposed for Kv1.3, in which S5/pore loop/S6 interact  
222 to establish a “reentrant pore architecture” and correct topology early in channel biogenesis  
223 without requiring tetramerization<sup>61,62</sup>. Interestingly, residues from neighboring subunits interact  
224 with this putative biogenic unit in the fully assembled channel (e.g., selectivity filter residues Y153,  
225 which forms a  $\delta$ - $\delta$  interaction with F143 and F155, carbon- $\delta$  interaction with E133) are relatively  
226 tolerant to mutations. This supports the idea that early trafficking-critical folding events involve  
227 only intra-monomer interactions.

228

229 **Regions involved in gating transitions to do not contribute to fold stability**

230 From the perspective of surface-trafficking as the measured phenotype, several regions of Kir2.1  
231 are tolerant to mutations. This includes the interface between pore and CTD (comprised of slide  
232 helix  $\alpha A/\alpha B$ , inner helix gate (I183–M188), and tether helix  $\alpha F$ ), the G-loop ( $\beta H-\beta I$  loop), and the  
233 residues lining the CTD cavity (loops between  $\beta C-\beta D$  and  $\beta E-\beta G$ ) at the interface between  
234 different subunits (**Fig. 3D**). Interestingly, these are involved in gating associated conformational  
235 changes<sup>37,63</sup> induced by the binding of PIP<sub>2</sub>, Kir2.1 allosteric activator (two-sided Fisher's Exact  
236 Test, p-value 8.091e-05, odds ratio 2.47). An explanation for high mutational tolerance in gating  
237 structural elements is that they have higher conformational flexibility required for interconversion  
238 between different gating states. They are therefore unlikely to contain motifs recognized by  
239 folding-based quality control mechanisms.

240

241 Kir2.1 appears to have an internal organization into contiguous regions involved in fold-stability  
242 (biogenic folding unit, IgG-like CTD) and gating transitions (TM/CTD interface, CTD subunit  
243 interfaces) with distinct mutational tolerance. To understand the relationship between folding and  
244 function, we assayed K<sup>+</sup> conductance as a second phenotype for the DMS library.

245

#### 246 **Functional phenotype assays map molecular determinants of conduction and PIP<sub>2</sub>** 247 **sensitization**

248 To assay variant function, we sorted the Kir2.1 DMS library (in duplicate, on separate days) into  
249 based on voltage-sensitive dye fluorescence, sequenced, and calculated fitness using the same  
250 Enrich2 package. This assay is based on premise that Kir2.1 decreases RMP resulting in  
251 decreased fluorescence of the FLIPR dye. Functional fitness was determined for 6,944 Kir2.1  
252 variants (93.4%), with similar replicates (Pearson correlations 0.86-0.93, **Supplementary Fig. 7**)  
253 and excellent read depth (greater than 30-fold at most positions, **Supplementary Fig. 8**;  
254 **Supplementary Table 1B**). Based on synonymous mutation standard deviations (**Fig. 4A**),  
255 median fitness error was low (15.3%). Unlike the bimodal distribution for surface-expression  
256 fitness, functional fitness is unimodal, with most mutations neutral (**Fig. 4A**); there is no distinct  
257 low function population likely due to lower dynamic range of the voltage sensitive dye compared  
258 to fluorescent antibody labelling (**Supplementary Figs. 2-3**). Function fitness is the combination  
259 of surface expression (number of channels on surface) and individual channel functional  
260 properties (open probability, single channel conductance, K<sup>+</sup> selectivity, etc.). Furthermore, as our  
261 assay is measuring steady-state RMP and even partially functional Kir2.1 will eventually



262 hyperpolarize the cell. This means we must interpret functional fitness in context of surface  
263 expression fitness.

264

265 Many variants in the pore domain have low functional fitness scores (e.g., pore helix, selectivity  
266 filter, **Fig. 4B**). For example, Y153 mutations, which have relatively tolerant surface fitness,  
267 strongly reduces function (**Fig. 4C**). Y153 interacts through  $\pi$ - $\pi$  interactions with F143 and F155  
268 on a neighboring subunit and mutations may preclude correct selectivity filter geometry to conduct  
269  $K^+$  ions. The conservative substitution Y153F has a neutral phenotype, in agreement with earlier  
270 electrophysiology studies <sup>64,65</sup>. Many positions along the pore helix that form a hydrogen bond  
271 network to support a conductive and  $K^+$  selective state <sup>66</sup> are very sensitive to mutation. Mutations  
272 of conserved hydrophobic residues in the CTD core beta sheet (e.g., W220) and the Golgi export  
273 signal (e.g., hydrophobic cleft residues Y316, W323, and salt bridge R45, E327) are deleterious  
274 as predicted by their effect on surface-expression.

275

276 Disordered N and C termini including the ER export signal FCYENE had moderately low surface-  
277 expression fitness but their functional fitness is mostly near neutral (**Fig. 4D,F**). This suggests  
278 mutations within the disordered regions only impact trafficking of otherwise properly folded and  
279 functional channel. Mutations within the unstructured termini they are deleterious to surface-  
280 expression and but neutral to individual channel function.

281

282  $PIP_2$  binding at the TM/CTD interface induces a disorder-to-order transition in the tether helix,  
283 contracting it and thereby translating the CTD toward the pore domain. The engagement between  
284 and CTD and pore domain allows the G-loop to wedge into the pore domain and the inner helix  
285 activation gate to open <sup>37</sup>.  $PIP_2$ 's binding site includes pore domain residues (R80, W81, R82,  
286 K190) and CTD residues (K186/193, K188/195, K189/196, R65, R219/226, R197). As expected,  
287 surface-expression fitness was neutral and functional fitness was negative (**Fig. 4E,G**). By  
288 focusing on mutation-sensitive positions, we can trace secondary structural elements that couple  
289 the  $PIP_2$  binding site to the Kir2.1's gate, the G-loop <sup>67</sup>. We find residues that directly interact with  
290  $PIP_2$  in the pore domain (R80, W81, R82) and tether helix (K190, K193, K195, K196). We find  
291 additional residues in the tether helix (R197),  $\beta$ B1 (L202), and interfacial helix (R65) interact with  
292 the allosteric coupling  $\beta$ C- $\beta$ D regions. Residues are highly sensitive in the entire  $\beta$ C- $\beta$ D and its  
293 interactions including a hydrophobic interface between  $\beta$ C and  $\beta$ I with each subunit, several

294 interactions couple to the  $\beta$ CD loop (e.g., H229) and  $\beta$ EG loop (e.g., F270) of one subunit to the  
295  $\beta$ H (I305),  $\beta$ I (R320), and the G-loop gate of another subunit (**Fig. 4H**).

296

297 Taken together, deep mutational scanning reinforces a central role of the  $\beta$ CD loop propagating  
298 PIP<sub>2</sub> binding at the TM/CTD interface to the G-loop gate. Molecular dynamics simulations  
299 uncovered an extended network of interactions between N-terminus, tether helix, CD loop keep  
300 the G-loop gate in a closed state<sup>63</sup>. Electrophysiology demonstrated that mutations in R219,  
301 which is conserved in the K<sub>IR</sub> family, attenuate PIP<sub>2</sub> affinity<sup>68</sup> and causes Anderson Tawill  
302 Syndrome<sup>69</sup>. Mutating the corresponding residues in GIRK2/Kir3.2 (R201A) constitutively  
303 activates channels, presumably by forcing the  $\beta$ CD loop into conformation that mimics the G-  
304 protein activated state<sup>70</sup>.

305

306 In GIRK2, an aspartic acid in  $\beta$ CD (D228) is a key residue in mediating regulation by intracellular  
307 sodium (an important physiological role of GIRK2). This Na<sup>+</sup> binding site propagates  
308 conformational changes in the CTD's  $\beta$  strands after G $\beta$  $\gamma$  binds to  $\beta$ DE and  $\beta$ LM loops, displacing  
309 the  $\beta$ LM loop upward to interact with the N-terminus and  $\beta$ CD loop, ultimately stabilizing the open  
310 conformational of the G loop gate<sup>71,72</sup>. The corresponding wildtype amino acid in Kir2.1, which is  
311 not regulated by Na<sup>+</sup>, is N224 (**Fig. 4B**). Interestingly, substitution with aspartate increases Kir2.1  
312 function, perhaps by recapitulating the Na<sup>+</sup> binding site, which also involves coordination from  
313 main chain carbonyls (R226, K227, S228). The function increasing effect of N224K (and the  
314 deleterious effect of N224R) could be explained through the Na<sup>+</sup>-independent stabilization of the  
315  $\beta$ CD loop through hydrogen bonding between the protonated epsilon-amino group of lysine  
316 (mimicking Na<sup>+</sup>) and the abovementioned carbonyl oxygens.

317

318 Another striking feature revealed by functional assays are function-increasing mutations near the  
319 helix bundle crossing gate of Kir2.1 (**Fig. 5A**). Previous studies suggested a kink occurring at  
320 G176 in TM2 widens the pore at the helix bundle crossing (HBC) allowing for K<sup>+</sup> to pass<sup>73-75</sup>. As  
321 expected, mutating G176 decreased function fitness. Substitution in residues below the kink-  
322 inducing G176 and above the actual bundle crossing (V187), increases functional fitness. This  
323 effect is strongest in A173, I175, I176, G177 (corresponding to S174, M176, I177, G178 in Kir2.2;  
324 **Fig. 5B**). Together, residues form a cuff above the HBC gate coupling TM2 from different subunits.  
325 The cuff may stabilize the unkinked conformation of TM2 to decrease open probability. Consistent  
326 with this idea, mutating cuff residues to large charged amino acids has the greatest function-

327 increasing effect (**Fig. 4C**). Perhaps mutating to large, charged residues disrupts nearby  
328 hydrophobic interactions networks that stabilize the HBC close state. The HBC gate is also  
329 stabilized by hydrophobic contacts to the TM1 of an adjacent subunit<sup>76,77</sup>. Consistent with TM1  
330 interactions forming a gating energy barrier, mutating interacting TM1 residues (F88; F86 in  
331 Kir2.2) also increases function fitness.

332

333 To identify regions that are important for function and not surface expression, we z-scored and  
334 subtracted surface expression from function fitness. We used t-tests with pooled variance  
335 estimated from all mutations to test significance of difference in fitness and function scores for  
336 each position (**Fig. 5C**). For many positions, surface scores were significantly lower than function  
337 scores (**Fig. 5C, cyan circles**). This subset includes the FLAG tag that is required for surface  
338 expression assay, but also Golgi export motifs, transmembrane helices, and CTD core beta  
339 sheets. For another subset of positions, function scores were significantly lower than surface-  
340 expression scores (**Fig. 5C, magenta circles**). This includes sites involved in gating (PIP<sub>2</sub> binding,  
341 G-loop gate), and K<sup>+</sup> conduction (selectivity filter). By making a binary assignment (based on p-  
342 value) whether a position belongs to one subset or the other and mapping this assignment onto  
343 the Kir2.2 structure, we again find structural organization around elements that are important for  
344 fold stability (TM, CTD beta sheets) and function (PIP<sub>2</sub> sensitization, gating, K<sup>+</sup> conduction) (**Fig.**  
345 **5D**). This distinct organization is clearest in the pore domain, where all interactions within a  
346 subunit are driving surface expression score (**Fig. 5E, cyan sticks**), while residues mediating  
347 subunit interactions (which is required for stability of the selectivity filter) are driving function score  
348 (**Fig. 5E, magenta sticks**). Other residues that drive function scores are distributed along an  
349 interaction network that connects the PIP<sub>2</sub> binding site (M2,  $\alpha$ F) with the slide helix ( $\alpha$ A/B),  $\beta$ CD  
350 loop,  $\beta$ EG loop, and the G-loop gate ( $\beta$ HI loop) (**Fig. 5F**). Intriguingly, this network involves  
351 interfaces between adjacent subunits (N-terminus $\leftrightarrow$  $\beta$ LM loop interface,  $\beta$ I $\leftrightarrow$  $\beta$ CD loop,  
352  $\beta$ D $\leftrightarrow$  $\beta$ EG loop). Subunit interactions determining gating is consistent with recent crystal  
353 structures of a forced-opened Kir2.2 in which inner helix gate opening requires CTD subunits to  
354 move relative to each other<sup>77</sup>.

355

356 Overall, the functional assay allows us to validate and test existing models of Kir2.1 gating while  
357 also providing further evidence that inter-subunit interactions serve as an energy barrier to bias  
358 Kir2.1's conformational ensemble towards closed states.

359

360 **Most pathogenic inward rectifier mutations are clustered within functionally important**  
361 **residues**

362 A central goal in molecular genetics is identifying the mechanistic basis by which mutations cause  
363 disease. Multiparametric DMS studies that interrogate multiple phenotypes associated with  
364 variants are a promising strategy to answer this question. Based on the premise that most  
365 mutation affect protein stability, approaches such as Vamp-Seq <sup>78</sup> were developed as  
366 generalizable measures of protein abundance. In cases such as Kir2.1, where proper trafficking,  
367 localization, and gating are crucial for producing functioning proteins, measuring abundance likely  
368 won't work. It is necessary to differentiate between mutations' effects on folding, trafficking, and  
369 gating to learn the mechanism for how genotype affects Kir2.1 phenotype. To learn potential  
370 pathogenicity and mechanism of action for reported disease-associated mutations, we compared  
371 the surface expression and fitness data to clinically observed mutations.

372  
373 Since the overall domain architecture and structure/function relationships are conserved within  
374 the inward rectifier family, we reasoned that the mechanisms underlying variant effects are  
375 conserved, as well. We therefore gathered missense variant effects reported in Clinvar and  
376 dbSNP for inward rectifiers. By aligning all human Kir, we assigned the corresponding Kir2.1  
377 position to each variant (total variant count: 613) and noted whether wildtype amino acid matches  
378 between Kir2.1 and the aligned Kir (**Supplemental Table 2**). To test if variants in Clinvar or  
379 dbSNP is related to surface-trafficking or function, we compared the empirical cumulative  
380 distribution functions of trafficking and function scores variants in databases vs. those that are  
381 not. They differed for trafficking scores but not for function scores (two-sided Kolmogorov-Smirnov  
382 test p-values  $4.28 \times 10^{-8}$  and 0.51, respectively; **Fig. 6A**). This means being listed in genetic  
383 variation databases is related to Kir2.1 function and less related to trafficking. Variants with low  
384 surface scores in our DMS, are underrepresented in databases. A likely explanation is that Kir2.1  
385 is essential for normal physiology and therefore under strong selection. Indeed, Kir2.1  
386 homozygous knockout mice die 8 to 12 hours after birth <sup>79</sup>. Kir2.1's missense constraint score,  
387 based on exome and whole-genomes sequencing deposited in gnomAD <sup>80</sup>, is 0.5 (i.e., 121  
388 observed vs. 240 expected missense mutations based on background mutation rates). Variants  
389 that misregulate surface trafficking likely are more deleterious (e.g., abolishing all K<sup>+</sup>  
390 conductance) than variants affecting function (e.g., gating kinetics), which is why they are  
391 extremely rare in the living human population. Consistent with this idea, exome and targeted  
392 sequencing in products of conception showed a significant enrichment of pathogenic variants

393 associated with cardiac channelopathies in stillbirths <sup>81</sup>. Furthermore, only one variant (W232C)  
394 of the 5 most surface-trafficking impairing positions on Kir2.1's Golgi export motif (R44, S315,  
395 E320, W323, G333) is reported in Clinvar.

396

397 The correspondence between variant listing and Inward Rectifier function is also apparent when  
398 we annotate mean surface-trafficking and function scores with pathogenic variants (**Fig. 6C**).  
399 Across the board, hotspots enriched for pathogenic disease-associated mutation have low  
400 function scores, whereas their surface-expression scores are more varied. Variants of uncertain  
401 significance followed this trend. In addition to regions involved in PIP<sub>2</sub>-binding ( $\alpha$ A/B slide helix,  
402 lower part of M1,  $\alpha$ F), and propagating conformational changes to the G-loop gate ( $\beta$ B1,  $\beta$ CD,  
403  $\beta$ HI loop), pore helix and selectivity filter are also hotspots for pathogenic variants. A notable  
404 exception to down-trending function in mutational hotspots is a cluster of disease-associated  
405 variants near the intracellular end of M2 (D180-A186). Interestingly, many Clinvar-reported  
406 variants (e.g., I183L) are associated with Short QT syndrome, a disease that can be caused by  
407 gain of function mutations in KNCJ2(Kir2.1) <sup>82</sup>. Consistent with this clinical phenotype, many  
408 mutations increase function (compared to wildtype Kir2.1). Based on known structure/function  
409 relationship in inward rectifiers, we speculate that substitutions increase function by increasing  
410 open probability of Kir2.1 by disrupting the inner helix gate (I183–M188).

411

412 We further divided fitness scores by assigned clinical significance to estimate the fitness score  
413 bounds of expert-reviewed benign and pathogenic variants (**Fig. 6D,E**). For surface fitness, we  
414 find that >97.5% of known benign variant have a fitness score > -0.43. With this lower bound  
415 assumption for benign variants, we predict that any 'variant of unknown significance' (VUS)  
416 scoring lower will be pathogenic with a loss of surface expression phenotype. Conversely, the  
417 upper surface fitness score bound (10<sup>th</sup> percentile) for expert reviewed benign was 0.95, and VUS  
418 with greater surface scores are predicted to have a gain of surface expression pathogenic  
419 phenotype. We applied the same reasoning to function fitness scores. Using this estimate, we  
420 can assign a predicted pathogenic phenotype (loss/gain of surface expression/function) to 69 of  
421 370 (18%) Kir2.1 VUS (**Supplemental Table 2**). The primary sequence location of these  
422 predicted pathogenic variants is shown in **Fig. 6C**. Many predicted loss of function variants  
423 localize to the slide & tether helices, G-loop gate, and selectivity filter/pore helix. Gain of surface  
424 expression variants map to the  $\beta$ BC and  $\beta$ K loop near the interface to  $\beta$ DE of a neighboring  
425 subunit. The putative biogenic folding unit (top of M1 & M2, pore helix) contains several predicted

426 loss of surface expression variants. Interestingly, no expert-reviewed pathogenic variants map to  
427 this region, which suggests that DMS-based prediction can identify new mutation hotspots.

428 We can also use estimated bounds of benign variants to predict the mechanism through which  
429 27 out of 144 (18.8%) expert-reviewed pathogenic variants cause Kir2.1 disorders. Of those, eight  
430 pathogenic variants have a predicted loss of surface expression while 19 are predicted loss of  
431 function. In line with function-impairing variant being overrepresented in ClinVar, the odds ratio  
432 between predicted loss of function phenotype of known pathogenic variants vs. all predicted  
433 pathogenic variants is significantly different (two-sided Fisher's exact test, p-value = 0.003144).

434  
435 Taken together, we find variants with deleterious surface-score are underreported in available  
436 database, which we propose is due to the essential nature of Kir2.1 in human physiology. Using  
437 surface and function scores for expert-assigned variant, we can estimate bounds for benign  
438 variants, which then allows us to predict VUS that are above or below these bound to the be gain  
439 or loss of surface expression/function, respectively. We can also predict the mechanism of action  
440 through which known pathogenic mutations cause Kir2.1 disorders. This suggests that DMS-  
441 derived surface-trafficking and function scores can be useful to predict pathogenicity and  
442 underlying mechanism of inherited and de-novo mutations. Because of the conserved architecture  
443 of the Inward Rectifier family, assignment of mutation hotspots may extend to the entire inward  
444 rectifier family. Further corresponding DMS studies in other members of the inward rectifier family  
445 are required to separate generalize themes from idiosyncrasies. For example, Kir6.2 requires  
446 binding to the ABC-transporter SUR1 to be expressed to the cell surface and function. This means  
447 that assay-reported phenotypes for a subset of variation at the Kir6.2/SUR1 interface (involving  
448  $\alpha$ A/B slide helix, M1,  $\beta$ LM sheets) have greater bearing in Kir6.2-linked diseases (e.g., diabetes  
449 mellitus). The methods described here are a blueprint for these studies.

450

## 451 **Discussion**

452 Deep Mutational Scanning (DMS) quantitatively links protein phenotypes to the genetic variation  
453 within the protein's coding sequence. This style of systematic amino acid substitution can reveal  
454 protein function<sup>83–85</sup>, determine protein structure<sup>86</sup>, and explain protein behavior in healthy and  
455 diseased cellular contexts<sup>87</sup>. Because protein don't exist in isolation –within the context of a cell  
456 folding, trafficking, and function states can all be modified through protein interaction (e.g.,  
457 chaperones) or ligand binding (e.g., allosteric modulators)– the phenotypic outcome of genetic  
458 variation can be multi-faceted. To start to explore the numerous impacts of mutations, we

459 measure two phenotypes of Kir2.1 variation: surface-trafficking K<sup>+</sup> conduction. Both assays are  
460 based on cell sorting mediated by fluorescent signals (antibody binding to an extracellular loop  
461 and voltage sensor dye). By measuring how variants are enriched or depleted, we assign  
462 quantitative fitness scores. Many other assay types are compatible with this approach, providing  
463 opportunities for even richer phenotypic description of ion channel variation. For example, a  
464 recently described approach, HiLITR<sup>88</sup>, could provide more granular resolution about trafficking  
465 motifs and Kir2.1 localization in living cells. Spontaneous spiking HEK cells<sup>89,90</sup>, which co-express  
466 Kir2.1, a voltage-dependent Na<sup>+</sup> channel (Nav1.7), the channelrhodopsin CheRiff, and genetically  
467 encoded voltage indicator QuasAr2, could be adapted to evaluate how ion channel expression  
468 levels and gating properties impact excitability<sup>91</sup>. When assays are conducted with chemical  
469 screening, they may aid in the discovery of novel allosteric modulators, state-dependent blockers,  
470 and molecular chaperones to precisely treat channelopathies based on genotype. Integration of  
471 disparate assays into a common framework of protein variation and its role in structure and  
472 function will be challenging but efforts to standardize reporting and unified statistical frameworks  
473 for interpretation (e.g., Enrich2<sup>48</sup>, the Atlas of Variant Effects<sup>92</sup>) are on the horizon.

474

475 Many of our findings with respect to mutational sensitivity of trafficking motifs, core structural  
476 elements, and regions of Kir2.1 involved in gating align with existing knowledge and biophysical  
477 intuition. Unlike previous more limited screens and intuition, our data is quantitative and enables  
478 data-driven approaches to construct global biophysical models of Kir2.1 structure and function.  
479 For example, the Golgi export signal comprised of two patches at the N-terminus and CTD was  
480 first described as a minimal set of hydrophobic residues along a CTD cleft and juxtaposed basic  
481 residues<sup>25</sup> and later expanded to adjacent sites<sup>18</sup>. Our comprehensive screen shows this  
482 trafficking motifs may indirectly probe the correct folding of the entire  $\beta$ -sheet core of the CTD. It  
483 reveals scope of what this trafficking motif is reporting to the cellular quality control machinery;  
484 not simply the proximity of a few basic and hydrophobic residues, but proper conformation of the  
485 entire CTD and assembly into tetramers.

486

487 We observed contiguous regions with neutral expression fitness involved in gating transitions  
488 while regions involved in fold-stability were highly sensitive to mutations. Looking at the same  
489 regions in functional data, we find the inverse. This suggests two things. First, comprehensive  
490 assessment of Kir2.1's phenotypes after perturbation (i.e., mutation) is a high-throughput method  
491 to annotate protein sequences into classes linked to specific functions (e.g., putative trafficking

492 signals, folding units, etc.). Conceptually this is similar to other high-throughput biochemical  
493 approaches that probe sequence-function relationships, such as circular permutation profiling<sup>93</sup>  
494 or high-throughput enzyme variant kinetics measurements<sup>94</sup>. Second, combining multiple  
495 assayed parameters is key to discover general organizational principles in Kir2.1, specifically two  
496 distinct structural regions with distinct roles in providing fold stability or dynamics required for  
497 gating transitions. Expanding to more measured phenotypes and integrating datasets may be the  
498 blueprint for ‘sequencing-based’ biophysics that probes protein function, folding, and dynamics  
499 through steady-state biochemical experiments.

500  
501 Our DMS studies provide additional context for the mechanistic basis of structure/function relation  
502 (e.g., reaffirming the  $\beta$ CD loop’s role in propagating PIP<sub>2</sub> binding at the TM/CTD interface to the  
503 G-loop gate). We find a biogenic folding unit that represents an early quality control step of  
504 reentrant pore architecture and correct topology likely while the monomer is in the translocon. A  
505 similar biogenic unit was described in voltage-dependent K<sup>+</sup> channels, where it is stabilized by an  
506 extensive network of interactions<sup>61</sup>. Furthermore, many ion channels have structurally  
507 homologous reentrant pore loop architectures and earlier studies suggested that the presence of  
508 an ‘aromatic cuff’ is a general feature of their biogenesis<sup>61,95</sup>. DMS studies may provide a path to  
509 probe the energetics and biophysics of stabilizing interactions and to test the hypothesis that  
510 hydrophobicity is a general stabilizing factor across reentrant pore loop architectures.

511  
512 DMS may also shed light on how subunit interactions determine inward rectifier gating properties.  
513 We find mutations near the interface of subunits strongly increase Kir2.1 function. This is  
514 consistent with subunits roles in setting channel gating properties. Single channel patch  
515 electrophysiology of Kir2.1/2.2 heterotetramers showed that addition of a Kir2.2 monomer  
516 increases single channel conductance and decreases the open dwell time ( $\tau_{open}$ )<sup>96</sup>. Perhaps this  
517 feature contributes to the observed differences in gating between inward rectifier homo- and  
518 heterotetramer, which differ in number and nature of subunit interactions.

519  
520 Our finding that variants with deleterious surface-score are underreported in available database  
521 supports the emerging theme that many disease-causing variants are linked to trafficking defects  
522<sup>13–16,16–23</sup>. Other large scale mutational analysis, as undertaken for the voltage-dependent K<sup>+</sup>  
523 channel Kv11.1<sup>97,98</sup>, has similarly shown that 88% of Long QT-linked variants have trafficking-



524 deficient mechanisms. They also demonstrate that data-driven approaches outperform smaller,  
525 more limited studies that predicted normal trafficking for most mutants <sup>99</sup>.

526 Underrepresentation in variant databases has implications for clinical practice, since standards  
527 for the interpretation of sequence variants are heavily focused on null variants (nonsense,  
528 frameshift), population frequency (frequent variants are likely benign), predicted functional effect  
529 (is the variant in an important domain), and case evidence <sup>100</sup>. In genes under strong purifying  
530 selection, such as KCNJ2/Kir2.1, missense mutations cause severe developmental defects  
531 (craniofacial structures, limb development <sup>79,101</sup>) likely contribute to or cause spontaneous  
532 abortions and pregnancy loss. These variants therefore never enter population- or clinical-  
533 associated variant databases. DMS studies are not limited by organismal viability to probe the  
534 structural and functional consequences of genetic variation. DMS could be useful to identify  
535 drivers of spontaneous abortions and the underlying mechanisms of recurrent pregnancy loss.

536 By comparing our experimentally determined fitness scores to expert-reviewed assignment of  
537 variants effects, which are often based on smaller scale direct biochemical studies, we can  
538 estimate the bounds of fitness scores for benign and pathogenic variants. This allows us to make  
539 predictions about pathogenicity and mechanisms of action for variants of unknown significance  
540 (VUS) and known pathogenic variants, closing the loop between high-throughput assays,  
541 biophysical mechanisms underlying fitness scores, and clinical interpretation of human variation  
542 in ion channel genes.

543 These examples demonstrate that deep mutational scanning of Kir2.1 combined with two simple  
544 readouts, provides detailed insight into the mechanistic basis of ion channel folding, function  
545 under steady state conditions, and how these processes become misregulated in disease.

546

## 547 **Materials and Methods**

548 *Kir2.1 DMS Library Generation:* Into mouse Kir2.1 (Uniprot P35561), we introduced a FLAG tag  
549 into an extracellular loop (at position T115) and added a downstream expression marker  
550 miRFP670 co-expressed via a P2A sequence. For Kir2.1 residues 2-391, each wildtype amino  
551 acid was mutated to all other 19 amino acids weighted by their codon usage frequency in humans.  
552 In addition to these missense mutations, mutations synonymous to wildtype were included for 20  
553 positions as a benchmark. We included missense mutation into the FLAG as a negative control.  
554 We generated this mouse Kir2.1 DMS library using the SPINE <sup>38</sup>, which we briefly summarize as  
555 follows: SPINE based libraries employ synthesized pools of DNA oligos with mutations at each  
556 position of a gene. Due to high error-rates in oligo synthesis, the current maximum length for

557 oligos is 230 base pairs. As most genes are longer than 230 base pairs, we break up our gene (8  
558 section in the case of Kir2.1) and replace a subsection of the gene with a pool of mutated oligos.  
559 The oligos are designed with unique barcodes for amplifying out a specific subpools library,  
560 Golden Gate compatible BsmBI cut sites, and the mutation within a subsection of Kir2.1. OLS  
561 oligos were designed using the SPINE scripts on Github (<https://github.com/schmidt-lab/spine>).  
562 These scripts design oligo libraries, primers for amplifying oligo-sublibraries, and inverse PCR  
563 primers for adding compatible cut sites to the Kir2.1 plasmid.

564 All backbone were amplified using a 25 cycle PCR with GXL polymerase and 1 ng of backbone  
565 DNA as template. The PCR product was then gel purified. All oligo libraries were amplified using  
566 25 cycles PCR with GXL polymerase and with 1 ul of the OLS library (resuspended in 1 ml TE)  
567 as template. To assemble the backbone and library DNA, BsmBI Golden Gate reactions were set  
568 up in 20 ul containing 100 ng of amplified backbone DNA, 20 ng of amplified oligo DNA, 0.2 µl  
569 BsaI-HFv2 (New England Biolabs), 0.4 µl T4 DNA ligase (New England Biolabs), 2 µl T4 DNA  
570 ligase buffer, and 2 µl 10 mg/ml BSA. These reactions were put in a thermocycler overnight using  
571 the following program: (1) 5 min at 42°C, (2) 10 min at 16°C, (3) repeat 40 times, (3) 42°C for 20  
572 min, (4) 80°C for 10 min. This reaction was cleaned using a Zymo Research Clean and  
573 Concentrate 5 kit and eluted in 6 ul of elution buffer. The entirety of this reaction transformed in  
574 E. Cloni 10G electrocompetent cells (Lucigen) according to manufacturer's instructions. Cells  
575 were grown overnight with shaking at 30°C to avoid overgrowth in 30 ml of LB with 40ug/ml  
576 kanamycin and library DNA was isolated using Zymo Zyppy miniprep kits. A small subset of  
577 transformed cells was plated varying dilutions to assess transformation efficiency and validate  
578 successful mutations. All libraries at this step yielded >300,000 colonies implying a 100x coverage  
579 (assuming 1/3 of the variants were perfect based on our previous analysis of Agilent OLS based  
580 libraries). Each sublibrary was combined at an equimolar ratio to make a complete library with all  
581 intended mutations included.

582  
583 *Stable Cell Line Generation:* To generate cell lines, we used a rapid single-copy mammalian cell  
584 line generation pipeline<sup>40</sup>. Briefly, mutational libraries are cloned into a staging plasmid with BxBI-  
585 compatible *attB* recombination sites using BsmBI Golden Gate cloning. We amplify the staging  
586 plasmid backbone using inverse PCR and the library of interest with primers that add  
587 complementary BsmBI cut sites. Golden Gate cloning and subsequent transformation is  
588 conducted with BsmBI (NEB), T4 Ligase (NEB) following manufacturer's using the same protocol  
589 as previously described for library generation. Completed library landing pad constructs are co-

590 transfected (1:1) with a BxB1 expression construct (pCAG-NLS-Bxb1) into (TetBxB1BFP-iCasp-  
591 Blast Clone 12 HEK293T cells) using Turbofect according to the manufacturer's instructions in 6  
592 wells of a 6-well dish. This cell line has a genetically integrated tetracycline induction cassette,  
593 followed by a BxB1 recombination site, and split rapalog inducible dimerizable Casp-9. Cells were  
594 maintained in D10 (DMEM, 10% fetal bovine serum (FBS), 1% sodium pyruvate, and 1%  
595 penicillin/streptomycin). Two days after transfection, doxycycline (2 ug/ml, Sigma-Aldrich) is  
596 added to induce expression of our genes of interest (successful recombination) or the iCasp-9  
597 selection system (no recombination). Successful recombination shifts the iCasp-9 out of frame,  
598 thus only cells that have undergone recombination survive, while those that haven't will die from  
599 iCasp-9-induced apoptosis. One day after doxycycline induction, AP1903 (10 nM,  
600 MedChemExpress) is added to cause dimerization of Casp9 and selectively kill cells without  
601 successful recombination. One day after AP1903-Casp9 selection, media is changed back to D10  
602 + Doxycycline (2 ug/ml, Sigma-Aldrich) for recovery. Two days after cells have recovered, cells  
603 are reseeded to enable normal cell growth. Once cells reach confluency, library cells are frozen  
604 in 50% FBS and 10% DMSO stocks in aliquots for assays.

605

606 *Surface Expression cell sorting:* Thawed stocks of library cell lines were seeded into a 10 cm dish  
607 and media was swapped the following day to D10. Cells were grown and split before confluency  
608 to maintain cell health. Media was swapped to D10 + doxycycline (2 ug/ml, Sigma-Aldrich) two  
609 days prior to the experiment. Cells were detached with 1 ml Accutase (Sigma-Aldrich), spun down  
610 and washed three times with FACS buffer (2% FBS, 0.1% NaN<sub>3</sub>, 1X PBS), incubated for 1-hour  
611 rocking at 4°C with a BV421 anti-flag antibody (BD Bioscience), washed twice with FACS buffers,  
612 filtered with cell strainer 5 ml tubes (Falcon), covered with aluminum foil, and kept on ice for  
613 transfer to the flow cytometry core. Before sorting, 5% of cells were for processing and sequencing  
614 as a baseline control.

615 Cells were sorted on a BD FACSAria II P69500132 cell sorter. miRFP670 fluorescence was  
616 excited with a 640 nm laser and recorded with a 670/30 nm bandpass filter and 505 nm long-pass  
617 filter. BV421 fluorescence was excited using a 405 nm laser. Cells were gated on forward  
618 scattering area and side scattering area to find whole cells, forward scattering width, and height  
619 to separate single cells, miRFP670 for cells that expressed variants without errors (our library  
620 generation results in single base pair deletions that will not have miRFP670 expression because  
621 deletions will shift the fluorescent protein out of frame <sup>38</sup>), and label for surface expressed cells.  
622 The surface expression label gate boundaries were determined based on unlabeled cells from

623 the same population because controls tend to have non-representative distributions. Example of  
624 the gating strategy for is depicted in **Supplemental Fig. 1**.

625 Cells were sorted based on surface expression into 4 populations (miRFP<sup>high</sup>/BV421<sup>none</sup>,  
626 miRFP<sup>high</sup>/BV421<sup>low</sup>, miRFP<sup>high</sup>/BV421<sup>medium</sup>, miRFP<sup>high</sup>/BV421<sup>high</sup>). We collected at least 2.1 million  
627 cells in each population to ensure a greater than 100x coverage for each sample in each subpool.  
628 The surface expression experiment was done in duplicate on separate days for two entirely  
629 independent replicates.

630

631 *Resting membrane potential cell sorting:* Concurrently with preparing samples for surface labeling  
632 another sample of the same cells were prepared for sorting based on resting membrane potential.  
633 These cells were initially washed with FACS buffer and concentrated in this buffer for cell health  
634 prior to sorting. 30 minutes prior to sorting cells were resuspended in Tyrode (125mM NaCl, 2mM  
635 KCl, 3mM CaCl<sub>2</sub>, 1mM MgCl<sub>2</sub>, 10mM HEPES, 30mM glucose, pH 7.3) that contained FLIPR  
636 membrane potential dye with a Blue quencher.

637 Cells were also sorted based on resting membrane potential on a BD FACSAria II P69500132  
638 cell sorter. miRFP670 fluorescence was excited with a 640 nm laser and recorded with a 670/30  
639 nm bandpass filter and 505 nm long-pass filter. FLIPR fluorescence was excited using a 488 nm  
640 laser and recorded on a 525/50 nm bandpass filter. As before the same general sorting scheme  
641 was used to identify whole single cells based on forward and side scatter and enriched for good  
642 quality library members based on miRFP670 fluorescence. An example of the gating strategy is  
643 in **Supplemental Fig. 2** Cells were sorted based on resting membrane potential into 3 populations  
644 (miRFP<sup>high</sup>/FLIPR<sup>Low</sup>, miRFP<sup>high</sup>/FLIPR<sup>medium</sup>, miRFP<sup>high</sup>/FLIPR<sup>high</sup>). The resting membrane potential  
645 experiment was done in duplicate on separate days for two entirely independent replicates.

646

647 *Sequencing:* For both biological replicates, DNA from pre-sort control and sorted cells was  
648 extracted with Microprep DNA kits (Zymo Research) and triple-eluted with water. The elute was  
649 diluted such that no more than 1.5ug of DNA was used per PCR reaction and amplified for 20  
650 cycles of PCR using Primestar GXL (Takara Bio), run on a 1% agarose gel, and gel purified.  
651 Primers that bind outside the recombination site ensure leftover plasmid DNA from the original  
652 cell line construction step is not amplified. Purified DNA was quantified using Picogreen DNA  
653 quantification. Equal amounts (by mass) of each domain insertion sample were pooled by cell  
654 sorting category (“pre-sort control”, “surface expression”, “no surface expression”). Pooled  
655 amplicons were prepared for sequencing using the Nextera XT sample preparation workflow and

656 sequenced using Illumina Novaseq in 2x150bp mode. Source sequencing data is available in the  
657 NCBI Sequence Raw Archive (<https://www.ncbi.nlm.nih.gov/sra>) under accession code  
658 PRJNA791691. Read count statistics are listed in **Supplemental Table 1A**.

659  
660 *Alignment and Enrichment Calculation:* Variant frequency for single mutations were determined  
661 by joining paired reads with bbmerge, aligning reads to the Kir2.1 reference gene sequence with  
662 bbmap, and identifying mutations and filtering to find the OLS programmed mutations with a  
663 custom python script. The 150 bp paired-end reads were trimmed to remove standard Illumina  
664 adapters (bbmap/resources) using BBDuk with 'mink' at 8 bases. Overlapping reads were  
665 corrected without merging using BBMerge with the 'ecco' and 'mix' setting. Reads were aligned  
666 to Kir2.1 sequence using BBMap using 'maxindel' at 500 and 'local' alignment. The resulting sam  
667 file was analyzed for mutations at each position and filtered to match only mutations that were  
668 programmed on the OLS chip. To calculate enrichment of mutations we used Enrich2<sup>48</sup>. Counts  
669 for each mutation were input into the Enrich2 software with weighted least squares scoring and  
670 wild type normalization. Scores were output with a standard error in a .csv file. Coverage of  
671 mapped reads is listed in **Supplemental Table 1B-C**.

672  
673 *Inward Rectifier Phylogenetic Alignment and Clinvar mutation assignment:* We downloaded all  
674 human inward rectifiers (KCNJ1(Kir1.1/ROMK; Uniprot P48048), KCNJ10(Kir1.2/Kir4.1; Uniprot  
675 P78508), KCNJ15(Kir1.3/Kir4.1; Uniprot Q99712), KCNJ2(Kir2.1; Uniprot P63252),  
676 KCNJ12(Kir2.2; Uniprot Q14500), KCNJ4(Kir2.3; Uniprot P48050), KCNJ14(Kir2.4; Uniprot  
677 Q9UNX9), KCNJ18(Kir2.6; Uniprot B7U540), KCNJ3(Kir3.1/GIRK1; Uniprot P48549),  
678 KCNJ6(Kir3.2/GIRK2; Uniprot P48051), KCNJ9(Kir3.3/GIRK3; Uniprot Q92806),  
679 KCNJ5(Kir3.4/GIRK4; Uniprot P48544), KCNJ16(Kir5.1; Uniprot Q9NPI9), KCNJ8(Kir6.1; Uniprot  
680 Q15842), KCNJ11(Kir6.2; Uniprot Q14654), KCNJ13(Kir7.1; Uniprot O60928) and aligned these  
681 together using MegaX<sup>102</sup>. Based on this alignment, we generated a master list of Inward Rectifier  
682 numberings to translate residue numbering between Kir homologues. We assigned mutations  
683 observed Clinvar and dbSNP and their pathogenic classification (ClinVar only) to this master  
684 alignment (**Supplementary Table 2**).

685

## 686 **Figure Legends**

687 **Figure 1 Deep Mutational Scanning to improve clinical variant prediction. (A)** Clinically  
688 observed variation in Kir2.1 and other Kir and their interpretation of pathogenicity. **(B)** Schematic

689 summarizing the various processes that must work correctly for Kir2.1 to fulfill its role in cellular  
690 physiology. **(C)** Schematic summarizing DMS and multiparametric assessment of phenotype.  
691 Mutations are introduced into Kir2.1 using SPINE. A stable single-copy insertion library is  
692 generated by BxB1-mediated recombination in HEK293T. Cells are sorted based on channel  
693 surface expression or function ( $K^+$  conductance) as determined by antibody labeling of an  
694 extracellular FLAG tag or voltage-sensitive dye, respectively. Genotypes of each sorted cell  
695 population are recovered by NextGen Sequencing (NGS).

696

697 **Figure 2 Surface Expression Fitness. (A)** Distribution of surface expression fitness scores for  
698 synonymous mutations (red line) and missense mutations (black line). **(B)** Heatmap of surface  
699 expression fitness scores (gradient from blue to red). Wildtype residues are indicated by green  
700 boxes. Missing data is indicated by yellow boxes. Synonymous mutations are indicated by red  
701 box outline. **(C)** Cartoon of Kir2.2 (PDB 3SPI, 70% identity with Kir2.1). Monomer chains show in  
702 different colors. Lipid bilayer boundaries are indicated by dashed lines. **(D)** Close-up of core beta  
703 sheet of the CTD with surface expression fitness mapped onto each residue as a gradient from  
704 blue to red. Residues that comprise the Golgi export signal are outlined green. **(E)** Interface close-  
705 up of neighboring subunits (green and magenta cartoons). Sidechain are colored by surface  
706 fitness score. Disrupting carbon- $\pi$  and  $\pi$ - $\pi$  interactions between F45, L246, and  
707 Y338 does not uniformly decrease fitness.

708

709 **Figure 3 Determinant of improve surface expression and Kir2.1's biogenic folding unit. (A)**  
710 Boxplots showing surface fitness in the  $\beta$ DE and  $\beta$ LM loop if the wildtype residues of a specific  
711 type (e.g., glutamate, charged) is mutated to another residue of the same type (e.g., Aspartate)  
712 or a different type (e.g., Tryptophan). Median is marked with a thick line, the vertical length of the  
713 box represents the interquartile range (IQR), upper fence: 75th percentile +1.5  $\times$  IQR, lower fence:  
714 25th percentile -1.5  $\times$  IQR, outlier points are shown as solid black circles. All data points are  
715 indicated by transparent dots. Only replacing aromatic residues significantly increase surface  
716 expression. Significance is tested using one-sided t-tests; p-values are indicated for each  
717 comparison. **(B)** Close-up of surface expression fitness scores (gradient blue to red) in the  $\beta$ DE  
718 and  $\beta$ LM loop. **(C)** Close-up of surface expression fitness scores in the pore domain. Residues  
719 that are part of the putative biogenic unit of Kir2.1 are show as sticks. **(D)** Surface expression  
720 fitness scores mapped onto a single Kir2.1 monomer highlighting the importance of the biogenic  
721 folding unit in the pore domain and the core beta sheet of the CTD.

722

723 **Figure 4 Function Fitness. (A)** Distribution of function expression fitness scores for synonymous  
724 mutations (red line) and missense mutations (black line). **(B)** Function fitness scores mapped onto  
725 a single Kir2.1 monomer highlighting the importance of the pore helix and selectivity filter, and the  
726 structural elements are the TM/CTD interface (e.g., interfacial helix, tether helix, G-loop gate) for  
727 function. **(C)** Heatmap of function expression fitness scores (gradient from green to magenta).  
728 Wildtype residues are indicated by blue boxes. Missing data is indicated by yellow boxes.  
729 Synonymous mutations are indicated by red box outline. **(D-G)** Heatmap of fitness score in  
730 regions that contain bona-fide trafficking signal **(D,E;** for surface and function scores, respectively)  
731 or the PIP<sub>2</sub> binding site **(F,G;** for surface and function scores, respectively). **(H)** Closeup of  
732 function fitness at the TM/CTD interface. Allosteric ligand PIP<sub>2</sub> is shown as sticks.

733

734 **Figure 5 HBC gate mutations and regions with distinct roles stability and function. (A)**  
735 Function Fitness (gradient from green to magenta) in the pore domain. One subunit is removed  
736 for clarity. K<sup>+</sup> ions in the selectivity filter a show as purple spheres. Sidechain of residues that are  
737 enriched for activating mutations are shown as sticks. **(B)** Detailed view of the HBC gate. **(C)**  
738 Difference between z-score normalized mean Function and Surface Fitness scores mapped by  
739 position. Filled circles (cyan or magenta) indicated significant differences (two-sided moderated t  
740 test p-value < 0.05). Kir2.1 secondary structural element are shown as gray boxes; trafficking  
741 signals are colored green. **(D-F)** Residues with significant function/surface fitness score  
742 differences are mapped onto the Kir2.2 structure (PBD 3SPI). Backbone cartoons are colored by  
743 chain. Residues with mutation that predominantly reduced function are shown in magenta.  
744 Residues with mutation that predominantly reduced surface expression are shown in cyan. PIP<sub>2</sub>  
745 is shown in blue. Overview **(D)**, close-ups of selectivity filter **(E)** and TM/CTD **(F)**.

746

747 **Figure 6 Folding and trafficking variants in clinical databases.** Cumulative distributions of  
748 surface **(A)** or function **(B)** fitness scores for variants that are represented in Clinvar and dbSNP  
749 (red line) or that are not (black line). **(C)** Line plot by position of mean function or surface fitness  
750 scores (gradient green to magenta and blue to red, respectively). Kir2.1 secondary structural  
751 element are shown as gray boxes. Pathogenic variants are mapped as circles with fill color  
752 indicating predicted pathogenic mechanism. Mutation hotspots are indicated by gray outlines.  
753 Distribution of surface fitness **(D)** and function fitness **(E)** by ClinVar pathogenicity assignment.

754 Vertical dashed lines represent 2.5<sup>th</sup> and 97.5<sup>th</sup> percentiles bounds of expert reviewed pathogenic  
755 variants (red) and benign (blue), respectively.

756

### 757 **Author contributions**

758 WCM, DN, and DS designed the work presented here. WCM and DN did the experiments with  
759 support from YH. DN processed the sequencing data. WCM and DS did the analysis and wrote  
760 the manuscript.

761

### 762 **Acknowledgement**

763 We are grateful for helpful discussions with Anna Gloyn, James Fraser, Gabbriella Estevam, Eric  
764 Greene, the DMS crew, and the rest of the Fraser lab. We also thank you for taking the time to  
765 read our manuscript. This work was supported by the National Institutes of Health  
766 (1R01GM136851 to D.S.) and a University of Minnesota Genome Center Illumina S2 grant. W.C.-  
767 M. is supported by a National Science Foundation Graduate Research Fellowship and a Howard  
768 Hughes Medical Institute Gilliam Fellowship for Advanced Study.

769

### 770 **Competing Interests**

771 The authors declare no competing interests.

772

### 773 **References**

774

- 775 1. Hibino, H. et al. Inwardly rectifying potassium channels: their structure, function, and  
776 physiological roles. *Physiol Rev* **90**, 291-366 (2010).
- 777 2. Bodhinathan, K. & Slesinger, P. A. Molecular mechanism underlying ethanol activation of  
778 G-protein-gated inwardly rectifying potassium channels. *Proc Natl Acad Sci U S A* **110**,  
779 18309-18314 (2013).
- 780 3. Marron Fernandez de Velasco, E., McCall, N. & Wickman, K. GIRK Channel Plasticity and  
781 Implications for Drug Addiction. *Int Rev Neurobiol* **123**, 201-238 (2015).
- 782 4. Torrecilla, M. et al. G-protein-gated potassium channels containing Kir3.2 and Kir3.3  
783 subunits mediate the acute inhibitory effects of opioids on locus ceruleus neurons. *J*  
784 *Neurosci* **22**, 4328-4334 (2002).
- 785 5. Rachidi, M. & Lopes, C. Mental retardation in Down syndrome: from gene dosage  
786 imbalance to molecular and cellular mechanisms. *Neurosci Res* **59**, 349-369 (2007).
- 787 6. Köhling, R. & Wolfart, J. Potassium Channels in Epilepsy. *Cold Spring Harb Perspect Med*  
788 **6**, (2016).
- 789 7. Zhang, L., Zheng, Y., Xie, J. & Shi, L. Potassium channels and their emerging role in  
790 parkinson's disease. *Brain Res Bull* **160**, 1-7 (2020).
- 791 8. Moss, A. J. & Kass, R. S. Long QT syndrome: from channels to cardiac arrhythmias. *J Clin*  
792 *Invest* **115**, 2018-2024 (2005).



- 793 9. Flagg, T. P., Tate, M., Merot, J. & Welling, P. A. A mutation linked with Bartter's syndrome  
794 locks Kir 1.1 a (ROMK1) channels in a closed state. *The Journal of general physiology*  
795 **114**, 685-700 (1999).
- 796 10. Stumvoll, M., Goldstein, B. J. & van Haeften, T. W. Type 2 diabetes: principles of  
797 pathogenesis and therapy. *Lancet* **365**, 1333-1346 (2005).
- 798 11. Abraham, M. R., Jahangir, A., Alekseev, A. E. & Terzic, A. Channelopathies of inwardly  
799 rectifying potassium channels. *FASEB J* **13**, 1901-1910 (1999).
- 800 12. Vuong, C. K., Black, D. L. & Zheng, S. The neurogenetics of alternative splicing. *Nat Rev*  
801 *Neurosci* **17**, 265-281 (2016).
- 802 13. Peters, M. et al. Classification and rescue of ROMK mutations underlying  
803 hyperprostaglandin E syndrome/antenatal Bartter syndrome. *Kidney Int* **64**, 923-932  
804 (2003).
- 805 14. O'Donnell, B. M., Mackie, T. D., Subramanya, A. R. & Brodsky, J. L. Endoplasmic  
806 reticulum-associated degradation of the renal potassium channel, ROMK, leads to type II  
807 Bartter syndrome. *J Biol Chem* **292**, 12813-12827 (2017).
- 808 15. Fallen, K. et al. The Kir channel immunoglobulin domain is essential for Kir1.1 (ROMK)  
809 thermodynamic stability, trafficking and gating. *Channels (Austin)* **3**, 57-68 (2009).
- 810 16. Zangerl-Plessl, E. M., Qile, M., Bloothoof, M., Sary-Weinzinger, A. & van der Heyden, M.  
811 A. G. Disease Associated Mutations in K<sub>IR</sub> Proteins Linked to Aberrant Inward Rectifier  
812 Channel Trafficking. *Biomolecules* **9**, (2019).
- 813 17. Lin, C. W. et al. Kir6.2 mutations associated with neonatal diabetes reduce expression of  
814 ATP-sensitive K<sup>+</sup> channels: implications in disease mechanism and sulfonylurea therapy.  
815 *Diabetes* **55**, 1738-1746 (2006).
- 816 18. Li, X., Ortega, B., Kim, B. & Welling, P. A. A Common Signal Patch Drives AP-1 Protein-  
817 dependent Golgi Export of Inwardly Rectifying Potassium Channels. *J Biol Chem* **291**,  
818 14963-14972 (2016).
- 819 19. Ma, D. et al. Golgi export of the Kir2.1 channel is driven by a trafficking signal located  
820 within its tertiary structure. *Cell* **145**, 1102-1115 (2011).
- 821 20. Ma, D. et al. Role of ER export signals in controlling surface potassium channel numbers.  
822 *Science* **291**, 316-319 (2001).
- 823 21. Ma, D. et al. Diverse trafficking patterns due to multiple traffic motifs in G protein-activated  
824 inwardly rectifying potassium channels from brain and heart. *Neuron* **33**, 715-729 (2002).
- 825 22. Stockklausner, C., Ludwig, J., Ruppertsberg, J. P. & Klöcker, N. A sequence motif  
826 responsible for ER export and surface expression of Kir2. 0 inward rectifier K<sup>+</sup> channels.  
827 *FEBS letters* **493**, 129-133 (2001).
- 828 23. Zerangue, N., Schwappach, B., Jan, Y. N. & Jan, L. Y. A new ER trafficking signal  
829 regulates the subunit stoichiometry of plasma membrane KATP channels. *Neuron* **22**, 537-  
830 548 (1999).
- 831 24. Leonoudakis, D. et al. Protein trafficking and anchoring complexes revealed by proteomic  
832 analysis of inward rectifier potassium channel (Kir2. x)-associated proteins. *Journal of*  
833 *Biological Chemistry* **279**, 22331-22346 (2004).
- 834 25. Ma, D. et al. Golgi export of the Kir2.1 channel is driven by a trafficking signal located  
835 within its tertiary structure. *Cell* **145**, 1102-1115 (2011).
- 836 26. Landrum, M. J. et al. ClinVar: improving access to variant interpretations and supporting  
837 evidence. *Nucleic acids research* **46**, D1062-D1067 (2018).
- 838 27. Tennessen, J. A. et al. Evolution and functional impact of rare coding variation from deep  
839 sequencing of human exomes. *science* **337**, 64-69 (2012).
- 840 28. McClellan, J. & King, M.-C. Genetic heterogeneity in human disease. *Cell* **141**, 210-217  
841 (2010).

- 842 29. Adzhubei, I. A. et al. A method and server for predicting damaging missense mutations.  
843 *Nat Methods* **7**, 248-249 (2010).
- 844 30. Ng, P. C. & Henikoff, S. SIFT: Predicting amino acid changes that affect protein function.  
845 *Nucleic Acids Res* **31**, 3812-3814 (2003).
- 846 31. Frazer, J. et al. Disease variant prediction with deep generative models of evolutionary  
847 data. *Nature* 1-5 (2021).
- 848 32. McLaughlin, R. N., Poelwijk, F. J., Raman, A., Gosal, W. S. & Ranganathan, R. The spatial  
849 architecture of protein function and adaptation. *Nature* **491**, 138-142 (2012).
- 850 33. Atkinson, J. T., Jones, A. M., Zhou, Q. & Silberg, J. J. Circular permutation profiling by  
851 deep sequencing libraries created using transposon mutagenesis. *Nucleic Acids Res* **46**,  
852 e76 (2018).
- 853 34. Coyote-Maestas, W. et al. Probing ion channel functional architecture and domain  
854 recombination compatibility by massively parallel domain insertion profiling. *Nat Commun*  
855 **12**, 7114 (2021).
- 856 35. Schmiedel, J. M. & Lehner, B. Determining protein structures using deep mutagenesis.  
857 *Nat Genet* **51**, 1177-1186 (2019).
- 858 36. Matreyek, K. A. et al. Multiplex assessment of protein variant abundance by massively  
859 parallel sequencing. *Nat Genet* **50**, 874-882 (2018).
- 860 37. Hansen, S. B., Tao, X. & MacKinnon, R. Structural basis of PIP2 activation of the classical  
861 inward rectifier K<sup>+</sup> channel Kir2.2. *Nature* **477**, 495-498 (2011).
- 862 38. Coyote-Maestas, W., Nedrud, D., Okorafor, S., He, Y. & Schmidt, D. Targeted insertional  
863 mutagenesis libraries for deep domain insertion profiling. *Nucleic Acids Res* (2019).
- 864 39. Nedrud, D., Coyote-Maestas, W. & Schmidt, D. A large-scale survey of pairwise epistasis  
865 reveals a mechanism for evolutionary expansion and specialization of PDZ domains.  
866 *Proteins* (2021).
- 867 40. Matreyek, K. A., Stephany, J. J., Chiasson, M. A., Hasle, N. & Fowler, D. M. An improved  
868 platform for functional assessment of large protein libraries in mammalian cells. *Nucleic*  
869 *Acids Res* **48**, e1 (2020).
- 870 41. Varghese, A., Tenbroek, E. M., Coles, J. & Sigg, D. C. Endogenous channels in HEK cells  
871 and potential roles in HCN ionic current measurements. *Prog Biophys Mol Biol* **90**, 26-37  
872 (2006).
- 873 42. Bendahhou, S. et al. Defective potassium channel Kir2.1 trafficking underlies Andersen-  
874 Tawil syndrome. *J Biol Chem* **278**, 51779-51785 (2003).
- 875 43. Pegan, S., Arrabit, C., Slesinger, P. A. & Choe, S. Andersen's syndrome mutation effects  
876 on the structure and assembly of the cytoplasmic domains of Kir2.1. *Biochemistry* **45**,  
877 8599-8606 (2006).
- 878 44. Tinker, A., Jan, Y. N. & Jan, L. Y. Regions responsible for the assembly of inwardly  
879 rectifying potassium channels. *Cell* **87**, 857-868 (1996).
- 880 45. Stockklausner, C., Ludwig, J., Ruppertsberg, J. P. & Klöcker, N. A sequence motif  
881 responsible for ER export and surface expression of Kir2.0 inward rectifier K(+) channels.  
882 *FEBS Lett* **493**, 129-133 (2001).
- 883 46. Coyote-Maestas, W., He, Y., Myers, C. L. & Schmidt, D. Domain insertion permissibility-  
884 guided engineering of allostery in ion channels. *Nat Commun* **10**, 290 (2019).
- 885 47. Adams, D. S. & Levin, M. Measuring resting membrane potential using the fluorescent  
886 voltage reporters DiBAC4(3) and CC2-DMPE. *Cold Spring Harb Protoc* **2012**, 459-464  
887 (2012).
- 888 48. Rubin, A. F. et al. A statistical framework for analyzing deep mutational scanning data.  
889 *Genome Biol* **18**, 150 (2017).

- 890 49. Vaidyanathan, R. et al. Inward Rectifier Potassium Channels (Kir2.x) and Caveolin-3  
891 Domain-Specific Interaction: Implications for Purkinje Cell-Dependent Ventricular  
892 Arrhythmias. *Circ Arrhythm Electrophysiol* **11**, e005800 (2018).
- 893 50. Ma, D. et al. Role of ER export signals in controlling surface potassium channel numbers.  
894 *Science* **291**, 316-319 (2001).
- 895 51. Hamill, S. J., Cota, E., Chothia, C. & Clarke, J. Conservation of folding and stability within  
896 a protein family: the tyrosine corner as an evolutionary cul-de-sac. *J Mol Biol* **295**, 641-649  
897 (2000).
- 898 52. Cota, E., Steward, A., Fowler, S. B. & Clarke, J. The folding nucleus of a fibronectin type  
899 III domain is composed of core residues of the immunoglobulin-like fold. *J Mol Biol* **305**,  
900 1185-1194 (2001).
- 901 53. Koster, J. C., Bentle, K. A., Nichols, C. G. & Ho, K. Assembly of ROMK1 (Kir 1.1a) inward  
902 rectifier K<sup>+</sup> channel subunits involves multiple interaction sites. *Biophys J* **74**, 1821-1829  
903 (1998).
- 904 54. Deutsch, C. Potassium channel ontogeny. *Annu Rev Physiol* **64**, 19-46 (2002).
- 905 55. Williams, M. A. & Fukuda, M. Accumulation of membrane glycoproteins in lysosomes  
906 requires a tyrosine residue at a particular position in the cytoplasmic tail. *J Cell Biol* **111**,  
907 955-966 (1990).
- 908 56. Tao, X., Avalos, J. L., Chen, J. & MacKinnon, R. Crystal structure of the eukaryotic strong  
909 inward-rectifier K<sup>+</sup> channel Kir2. 2 at 3.1 Å resolution. *Science* **326**, 1668-1674 (2009).
- 910 57. Cho, H. C., Tsushima, R. G., Nguyen, T. T., Guy, H. R. & Backx, P. H. Two critical  
911 cysteine residues implicated in disulfide bond formation and proper folding of Kir2.1.  
912 *Biochemistry* **39**, 4649-4657 (2000).
- 913 58. Leyland, M. L., Dart, C., Spencer, P. J., Sutcliffe, M. J. & Stanfield, P. R. The possible role  
914 of a disulphide bond in forming functional Kir2.1 potassium channels. *Pflugers Arch* **438**,  
915 778-781 (1999).
- 916 59. Dassau, L., Conti, L. R., Radeke, C. M., Ptáček, L. J. & Vandenberg, C. A. Kir2. 6  
917 regulates the surface expression of Kir2. x inward rectifier potassium channels. *Journal of*  
918 *Biological Chemistry* **286**, 9526-9541 (2011).
- 919 60. Valiyaveetil, F. I., Sekedat, M., Mackinnon, R. & Muir, T. W. Glycine as a D-amino acid  
920 surrogate in the K<sup>(+)</sup>-selectivity filter. *Proc Natl Acad Sci U S A* **101**, 17045-17049 (2004).
- 921 61. Delaney, E., Khanna, P., Tu, L., Robinson, J. M. & Deutsch, C. Determinants of pore  
922 folding in potassium channel biogenesis. *Proc. Natl. Acad. Sci. U.S.A.* **111**, 4620-4625  
923 (2014).
- 924 62. Gajewski, C., Dagcan, A., Roux, B. & Deutsch, C. Biogenesis of the pore architecture of a  
925 voltage-gated potassium channel. *Proc Natl Acad Sci U S A* **108**, 3240-3245 (2011).
- 926 63. Li, J. et al. Identification of the Conformational transition pathway in PIP 2 Opening Kir  
927 Channels. *Scientific reports* **5**, 1-12 (2015).
- 928 64. Heginbotham, L., Lu, Z., Abramson, T. & MacKinnon, R. Mutations in the K<sup>+</sup> channel  
929 signature sequence. *Biophysical journal* **66**, 1061-1067 (1994).
- 930 65. Splitt, H., Meuser, D., Borovok, I., Betzler, M. & Schrempf, H. Pore mutations affecting  
931 tetrameric assembly and functioning of the potassium channel KcsA from *Streptomyces*  
932 *lividans*. *FEBS Lett* **472**, 83-87 (2000).
- 933 66. Cheng, W. W., McCoy, J. G., Thompson, A. N., Nichols, C. G. & Nimigean, C. M.  
934 Mechanism for selectivity-inactivation coupling in KcsA potassium channels. *Proc Natl*  
935 *Acad Sci U S A* **108**, 5272-5277 (2011).
- 936 67. Pegan, S. et al. Cytoplasmic domain structures of Kir2.1 and Kir3.1 show sites for  
937 modulating gating and rectification. *Nat Neurosci* **8**, 279-287 (2005).

- 938 68. Lopes, C. M. B. et al. Alterations in conserved Kir channel-PIP2 interactions underlie  
939 channelopathies. *Neuron* **34**, 933-944 (2002).
- 940 69. Plaster, N. M. et al. Mutations in Kir2. 1 cause the developmental and episodic electrical  
941 phenotypes of Andersen's syndrome. *Cell* **105**, 511-519 (2001).
- 942 70. Whorton, M. R. & MacKinnon, R. Crystal structure of the mammalian GIRK2 K<sup>+</sup> channel  
943 and gating regulation by G proteins, PIP2, and sodium. *Cell* **147**, 199-208 (2011).
- 944 71. Mahajan, R. et al. A computational model predicts that G $\beta\gamma$  acts at a cleft between  
945 channel subunits to activate GIRK1 channels. *Sci Signal* **6**, ra69 (2013).
- 946 72. Whorton, M. R. & MacKinnon, R. X-ray structure of the mammalian GIRK2- $\beta\gamma$  G-protein  
947 complex. *Nature* **498**, 190-197 (2013).
- 948 73. Jin, T. et al. The  $\beta\gamma$  subunits of G proteins gate a K<sup>+</sup> channel by pivoted bending of a  
949 transmembrane segment. *Molecular cell* **10**, 469-481 (2002).
- 950 74. Sadjja, R., Smadja, K., Alagem, N. & Reuveny, E. Coupling Gbetagamma-dependent  
951 activation to channel opening via pore elements in inwardly rectifying potassium channels.  
952 *Neuron* **29**, 669-680 (2001).
- 953 75. Jiang, Y. et al. The open pore conformation of potassium channels. *Nature* **417**, 523-526  
954 (2002).
- 955 76. Meng, X. Y., Liu, S., Cui, M., Zhou, R. & Logothetis, D. E. The Molecular Mechanism of  
956 Opening the Helix Bundle Crossing (HBC) Gate of a Kir Channel. *Sci Rep* **6**, 29399  
957 (2016).
- 958 77. Zangerl-Pleschl, E. M. et al. Atomistic basis of opening and conduction in mammalian  
959 inward rectifier potassium (Kir2.2) channels. *J Gen Physiol* **152**, e201912422 (2020).
- 960 78. Matreyek, K. A. et al. Multiplex assessment of protein variant abundance by massively  
961 parallel sequencing. *Nat Genet* **50**, 874-882 (2018).
- 962 79. Zaritsky, J. J., Redell, J. B., Tempel, B. L. & Schwarz, T. L. The consequences of  
963 disrupting cardiac inwardly rectifying K(+) current (I(K1)) as revealed by the targeted  
964 deletion of the murine Kir2.1 and Kir2.2 genes. *J Physiol* **533**, 697-710 (2001).
- 965 80. Karczewski, K. J. et al. The mutational constraint spectrum quantified from variation in  
966 141,456 humans. *Nature* **581**, 434-443 (2020).
- 967 81. Sahlin, E. et al. Identification of putative pathogenic single nucleotide variants (SNVs) in  
968 genes associated with heart disease in 290 cases of stillbirth. *PLoS One* **14**, e0210017  
969 (2019).
- 970 82. Priori, S. G. et al. A novel form of short QT syndrome (SQT3) is caused by a mutation in  
971 the KCNJ2 gene. *Circ Res* **96**, 800-807 (2005).
- 972 83. Araya, C. L. et al. A fundamental protein property, thermodynamic stability, revealed solely  
973 from large-scale measurements of protein function. *Proc Natl Acad Sci U S A* **109**, 16858-  
974 16863 (2012).
- 975 84. Fowler, D. M. et al. High-resolution mapping of protein sequence-function relationships.  
976 *Nat Methods* **7**, 741-746 (2010).
- 977 85. Starr, T. N. et al. Deep Mutational Scanning of SARS-CoV-2 Receptor Binding Domain  
978 Reveals Constraints on Folding and ACE2 Binding. *Cell* **182**, 1295-1310.e20 (2020).
- 979 86. Schmiedel, J. M. & Lehner, B. Determining protein structures using deep mutagenesis.  
980 *Nat Genet* **51**, 1177-1186 (2019).
- 981 87. Matreyek, K. A., Stephany, J. J., Ahler, E. & Fowler, D. M. Integrating thousands of PTEN  
982 variant activity and abundance measurements reveals variant subgroups and new  
983 dominant negatives in cancers. *Genome Med* **13**, 165 (2021).
- 984 88. Coukos, R. et al. An engineered transcriptional reporter of protein localization identifies  
985 regulators of mitochondrial and ER membrane protein trafficking in high-throughput  
986 CRISPRi screens. *Elife* **10**, e69142 (2021).

- 987 89. Hochbaum, D. R. et al. All-optical electrophysiology in mammalian neurons using  
988 engineered microbial rhodopsins. *Nat Methods* **11**, 825-833 (2014).
- 989 90. Park, J. et al. Screening fluorescent voltage indicators with spontaneously spiking HEK  
990 cells. *PLoS One* **8**, e85221 (2013).
- 991 91. O'Leary, T., Williams, A. H., Franci, A. & Marder, E. Cell types, network homeostasis, and  
992 pathological compensation from a biologically plausible ion channel expression model.  
993 *Neuron* **82**, 809-821 (2014).
- 994 92. Fowler, D. M. et al. The Atlas of Variant Effects (AVE) Alliance: understanding genetic  
995 variation at nucleotide resolution. (2021).
- 996 93. Atkinson, J. T., Jones, A. M., Zhou, Q. & Silberg, J. J. Circular permutation profiling by  
997 deep sequencing libraries created using transposon mutagenesis. *Nucleic acids research*  
998 **46**, e76-e76 (2018).
- 999 94. Markin, C. J. et al. Revealing enzyme functional architecture via high-throughput  
1000 microfluidic enzyme kinetics. *Science* **373**, eabf8761 (2021).
- 1001 95. Doyle, D. A. et al. The structure of the potassium channel: molecular basis of K<sup>+</sup>  
1002 conduction and selectivity. *Science* **280**, 69-77 (1998).
- 1003 96. Panama, B. K., McLerie, M. & Lopatin, A. N. Functional consequences of Kir2.1/Kir2.2  
1004 subunit heteromerization. *Pflugers Arch* **460**, 839-849 (2010).
- 1005 97. Anderson, C. L., Kuzmicki, C. E., Childs, R. R. & Hintz..., C. J. Large-scale mutational  
1006 analysis of Kv11. 1 reveals molecular insights into type 2 long QT syndrome. *Nature ...*  
1007 (2014).
- 1008 98. Kozek, K. A., Glazer, A. M., Ng, C. A., Blackwell, D. & Egly..., C. L. High-throughput  
1009 discovery of trafficking-deficient variants in the cardiac potassium channel KV11. 1. *Heart*  
1010 *Rhythm* (2020).
- 1011 99. Harley, C. A., Jesus, C. S. H., Carvalho, R. & Brito..., R. M. M. Changes in channel  
1012 trafficking and protein stability caused by LQT2 mutations in the PAS domain of the HERG  
1013 channel. *PLoS ...* (2012).
- 1014 100. Richards, S. et al. Standards and guidelines for the interpretation of sequence variants: a  
1015 joint consensus recommendation of the American College of Medical Genetics and  
1016 Genomics and the Association for Molecular Pathology. *Genet Med* **17**, 405-424 (2015).
- 1017 101. Belus, M. T. et al. Kir2.1 is important for efficient BMP signaling in mammalian face  
1018 development. *Dev Biol* **444 Suppl 1**, S297-S307 (2018).
- 1019 102. Kumar, S., Stecher, G., Li, M., Knyaz, C. & Tamura, K. MEGA X: molecular evolutionary  
1020 genetics analysis across computing platforms. *Molecular biology and evolution* **35**, 1547  
1021 (2018).
- 1022

**A**

| Clinical Interpretation                      | Kir2.1 | other Kir |
|----------------------------------------------|--------|-----------|
| Benign                                       | 1      | 15        |
| Conflicting interpretations of pathogenicity | 12     | 27        |
| Likely benign                                | 1      | 10        |
| Likely pathogenic                            | 17     | 25        |
| not provided                                 | 16     | 2         |
| Pathogenic                                   | 27     | 79        |
| Uncertain significance                       | 89     | 299       |

**B**

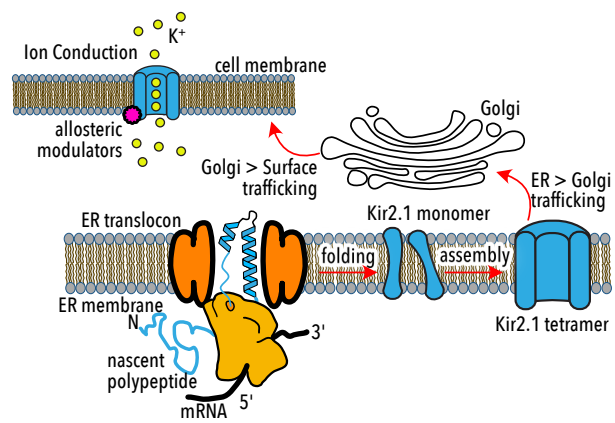

**C**

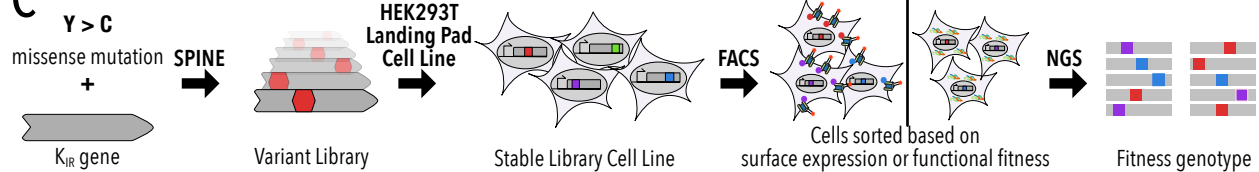

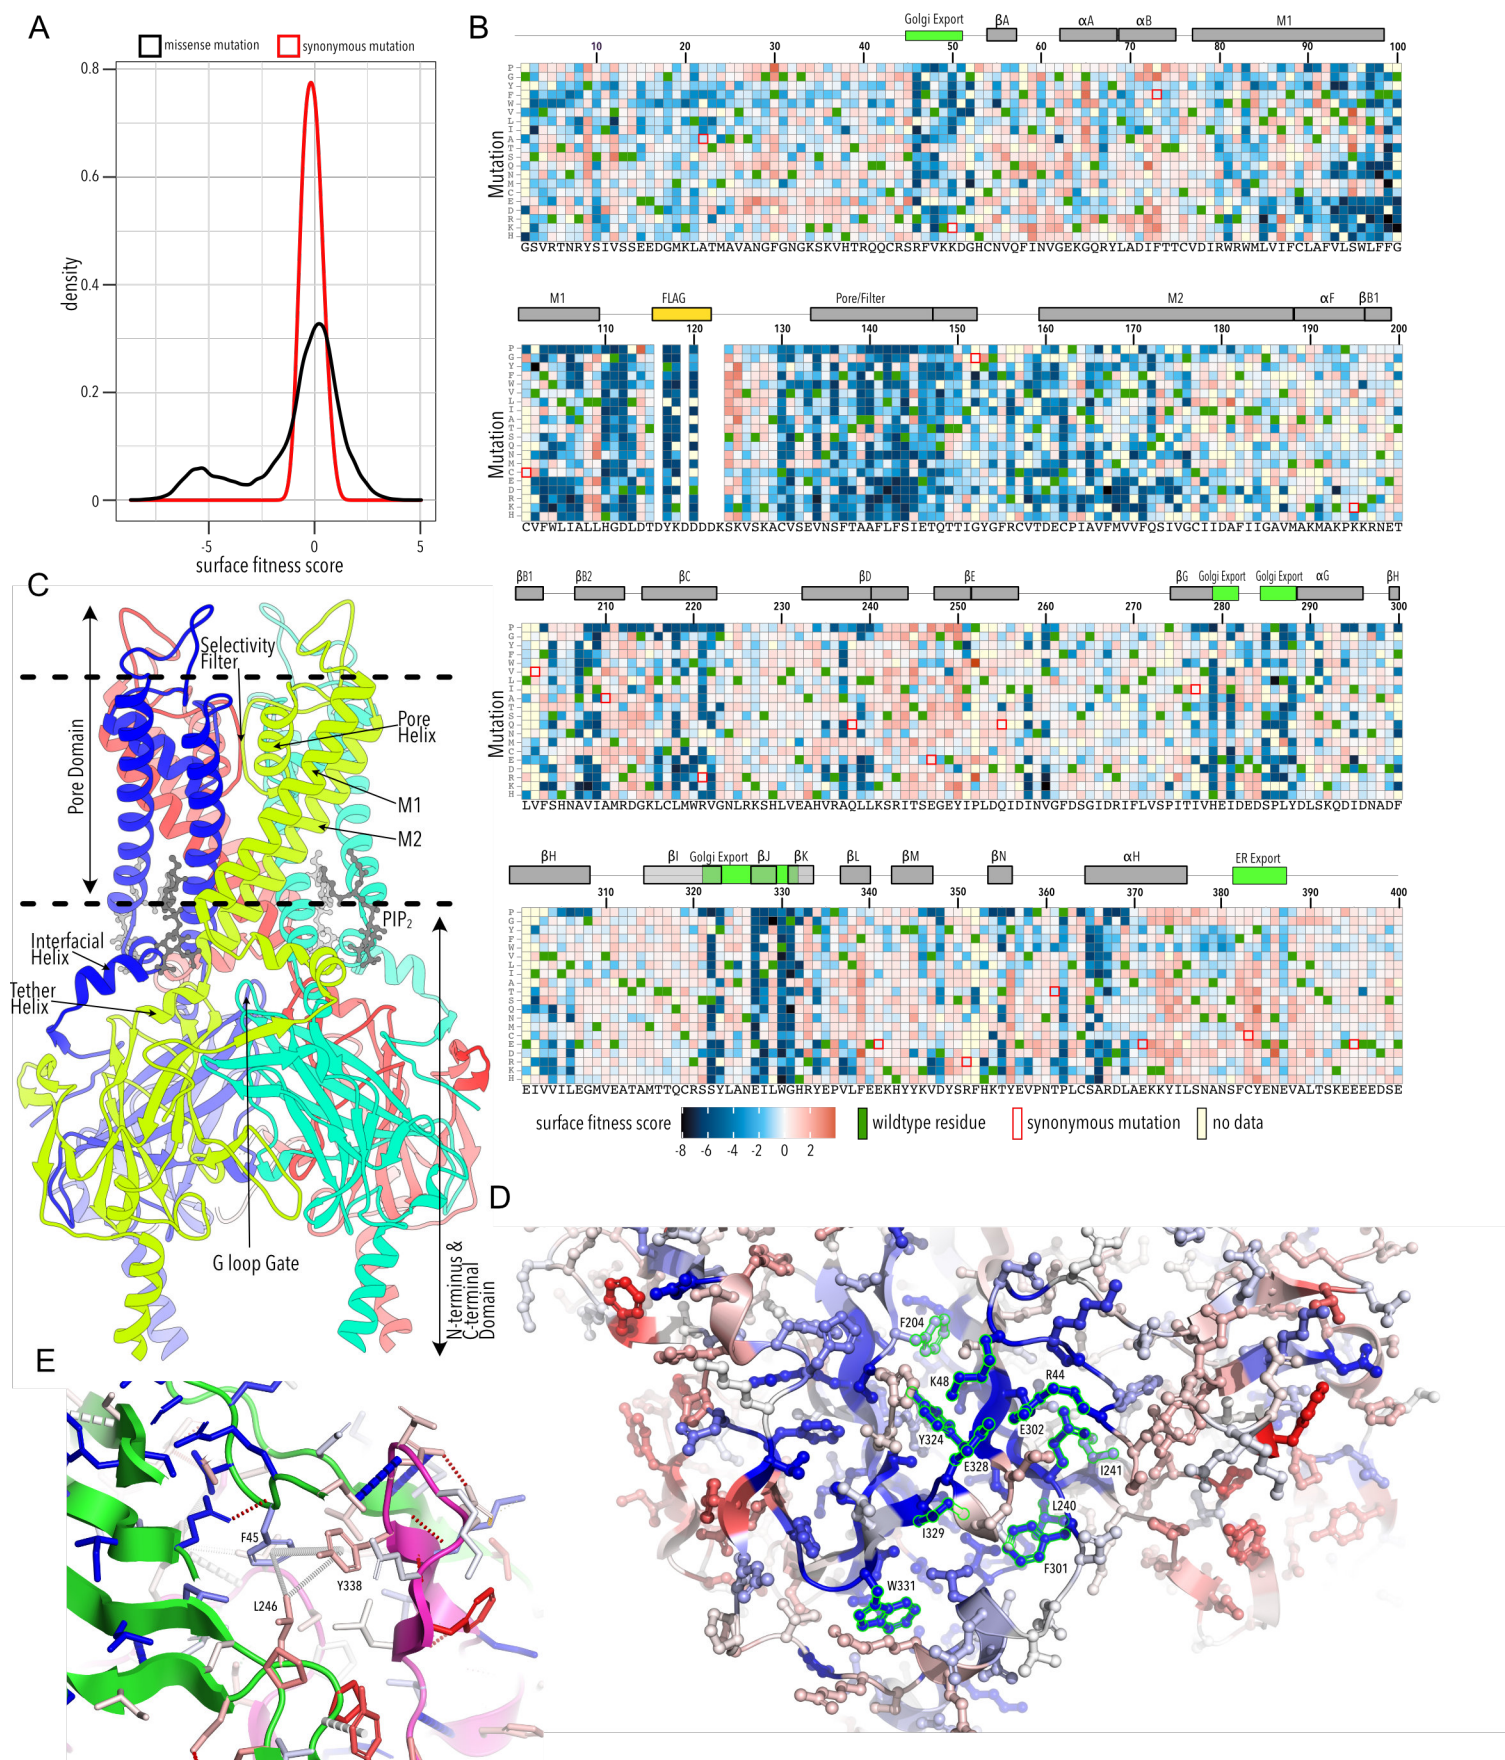

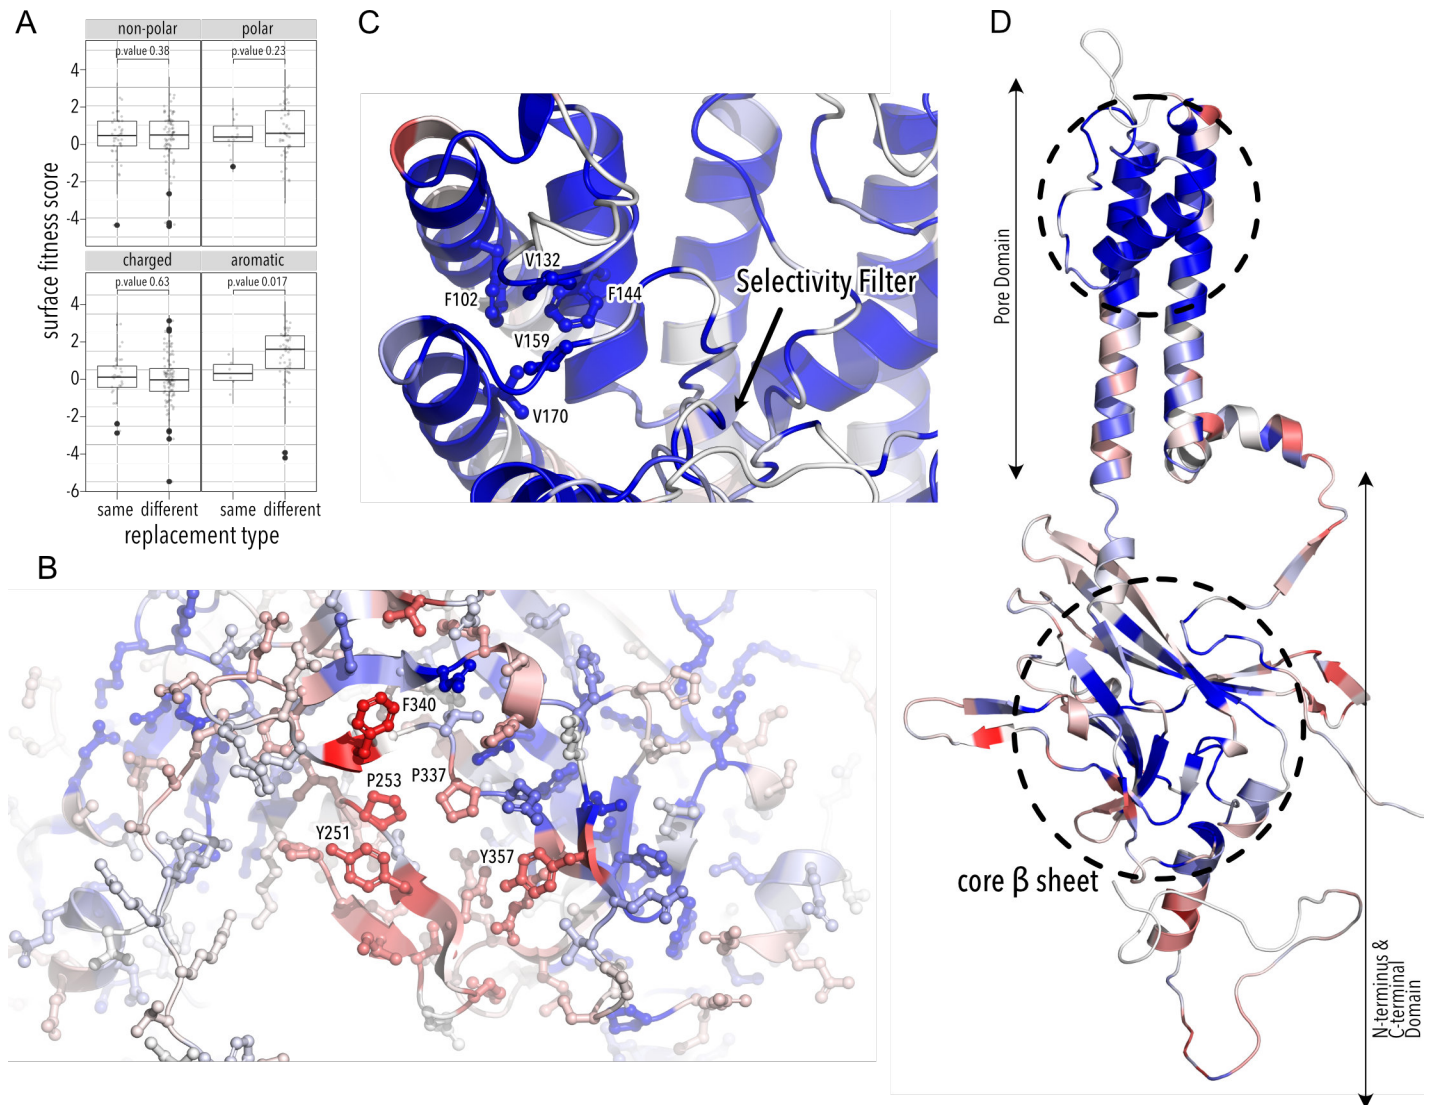



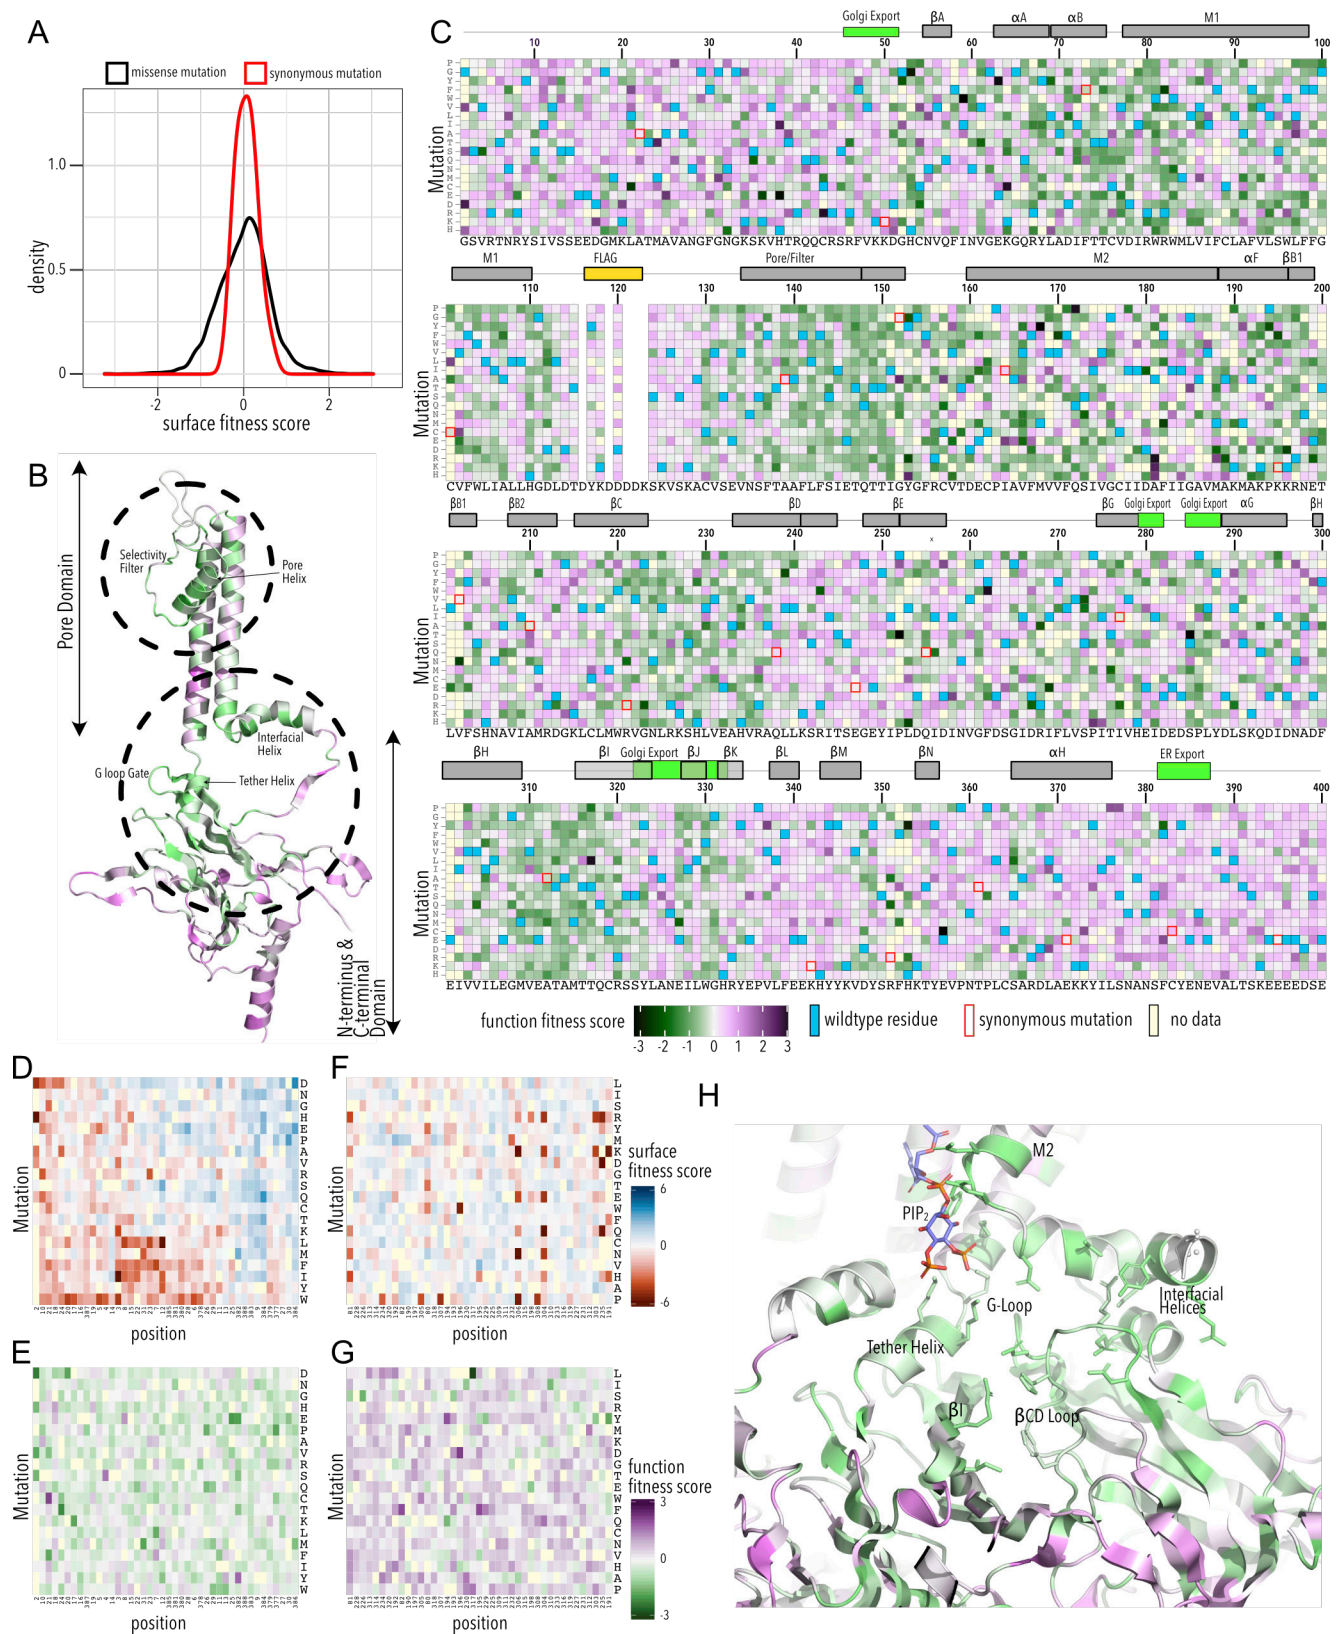

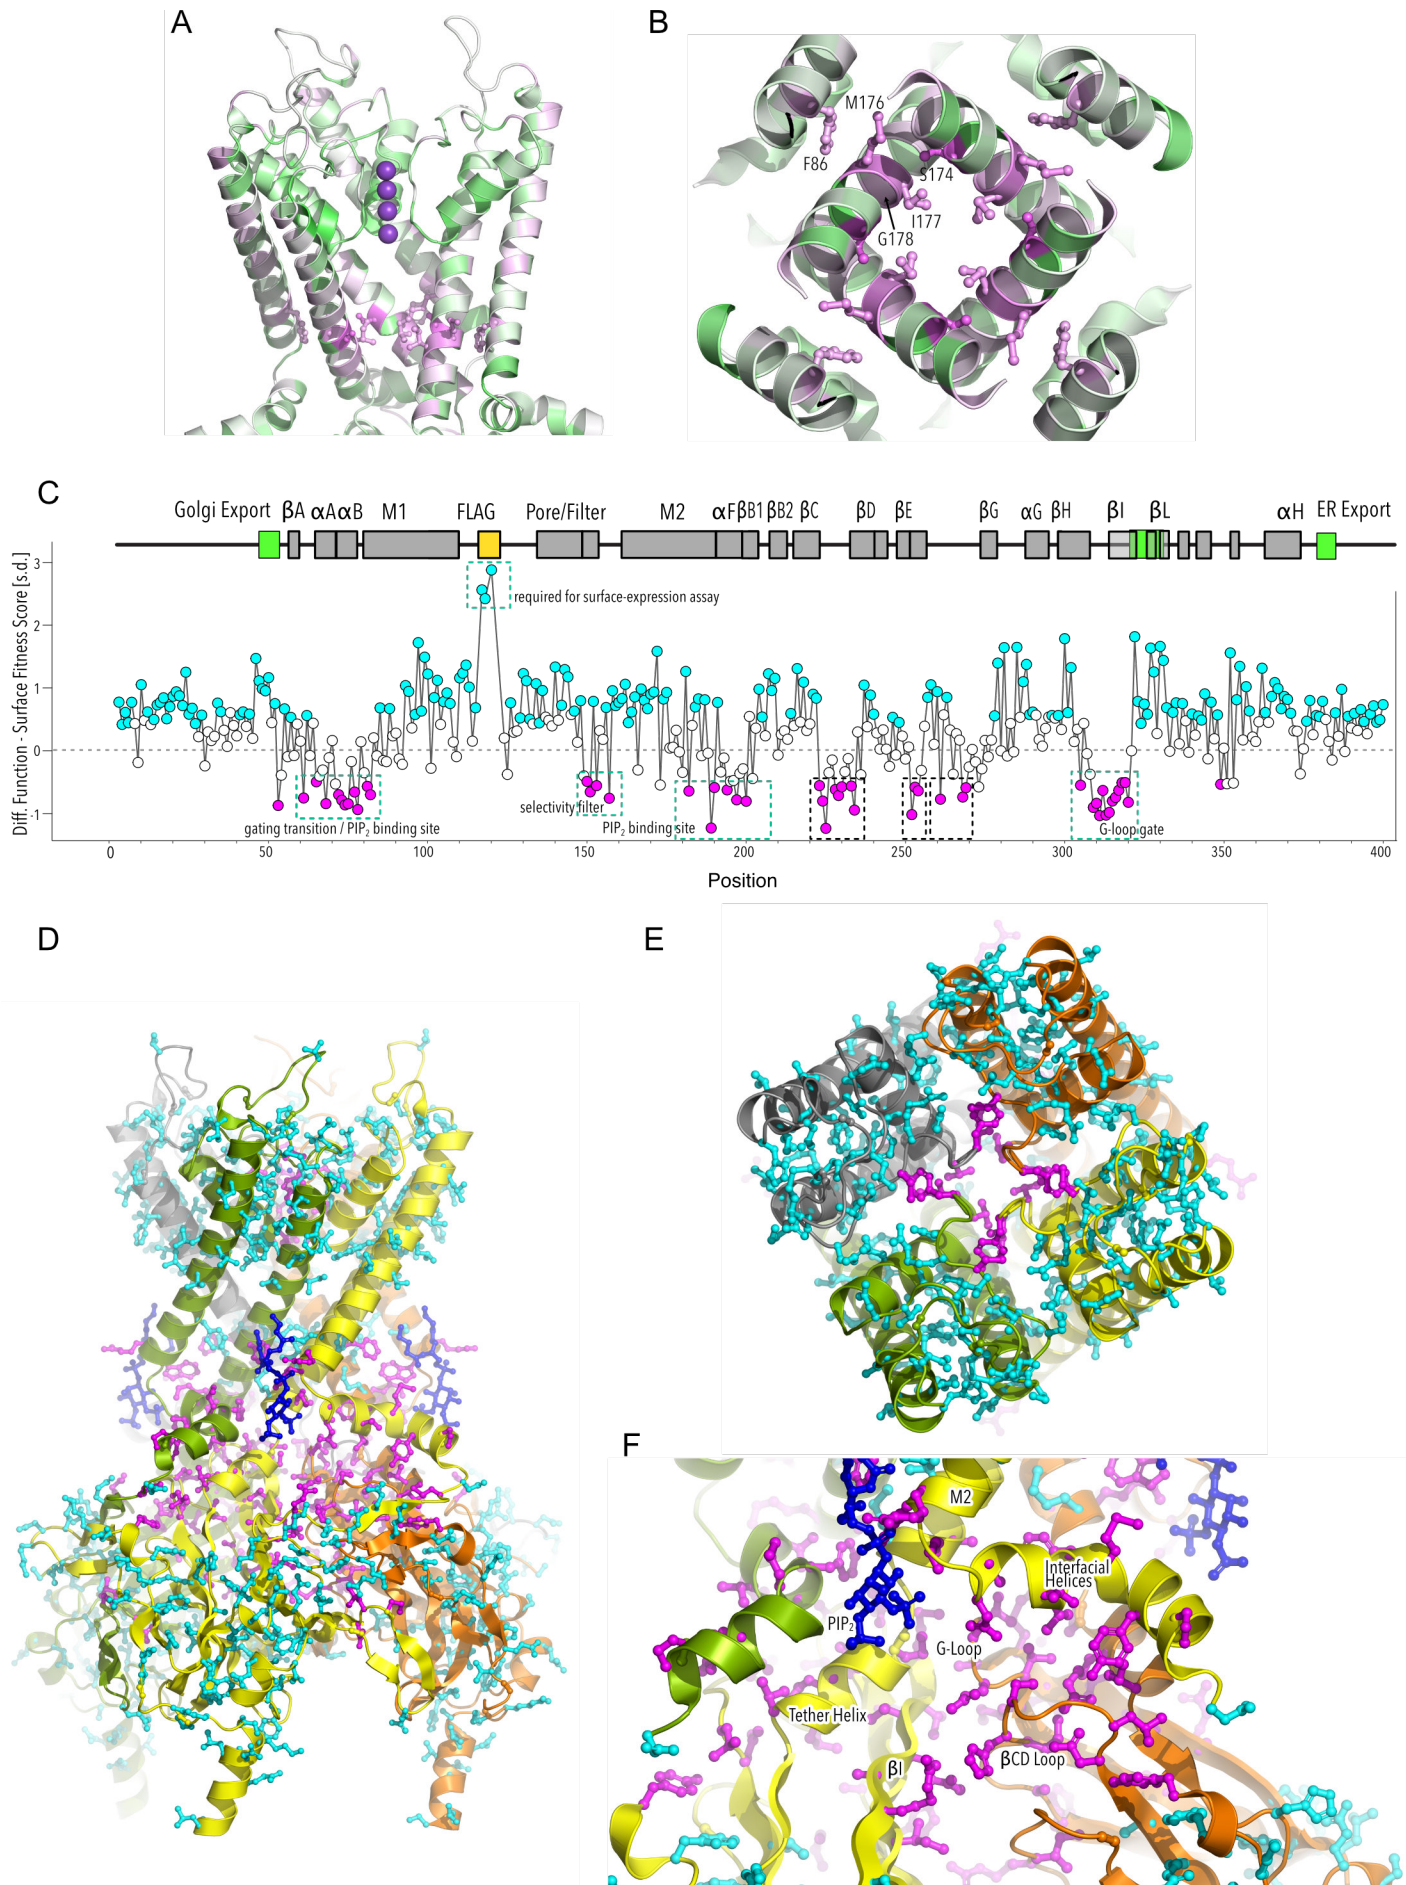

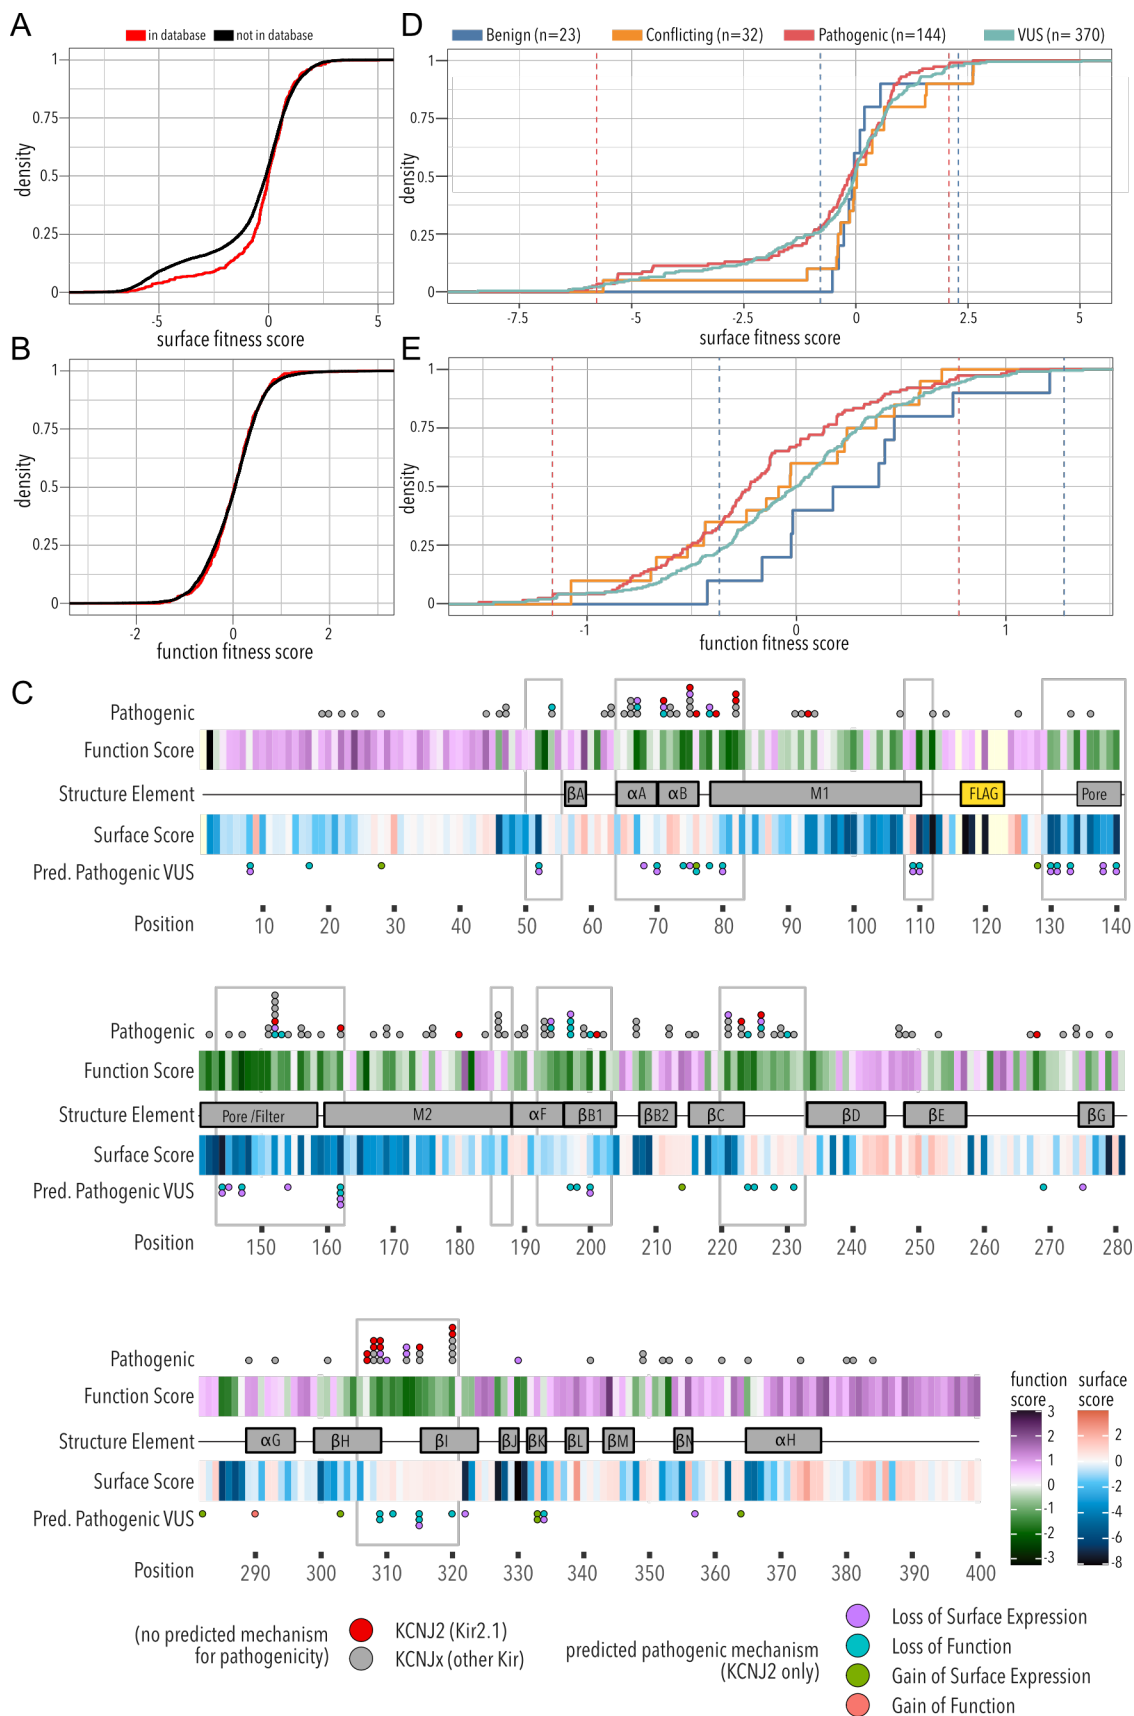

## **SUPPLEMENTARY MATERIALS FOR:**

### **Determinants of trafficking, conduction, and disease within a K<sup>+</sup> channel revealed through multiparametric deep mutational scanning**

Short Title: Multiparametric Deep Mutational Scanning in the Inward Rectifier Kir2.1

Authors:

Willow Coyote-Maestas<sup>1#</sup>, David Nedrud<sup>1</sup>, Yungui He<sup>2</sup>, Daniel Schmidt<sup>2§</sup>

Affiliations:

<sup>1</sup>Department of Biochemistry, Molecular Biology & Biophysics, University of Minnesota, Minneapolis, MN, 55455, USA

<sup>2</sup> Department of Genetics, Cell Biology & Development, University of Minnesota, Minneapolis, MN, 55455, USA

#Present address: Department of Bioengineering and Therapeutic Science and Quantitative Biosciences Institute, University of California, San Francisco, San Francisco, CA, 94158

§Correspondence and requests for materials should be addressed to D.S. (email: [schmida@umn.edu](mailto:schmida@umn.edu))

#### **This PDF file includes:**

Supplemental Figures 1 – 9

Supplemental Tables 1 – 3

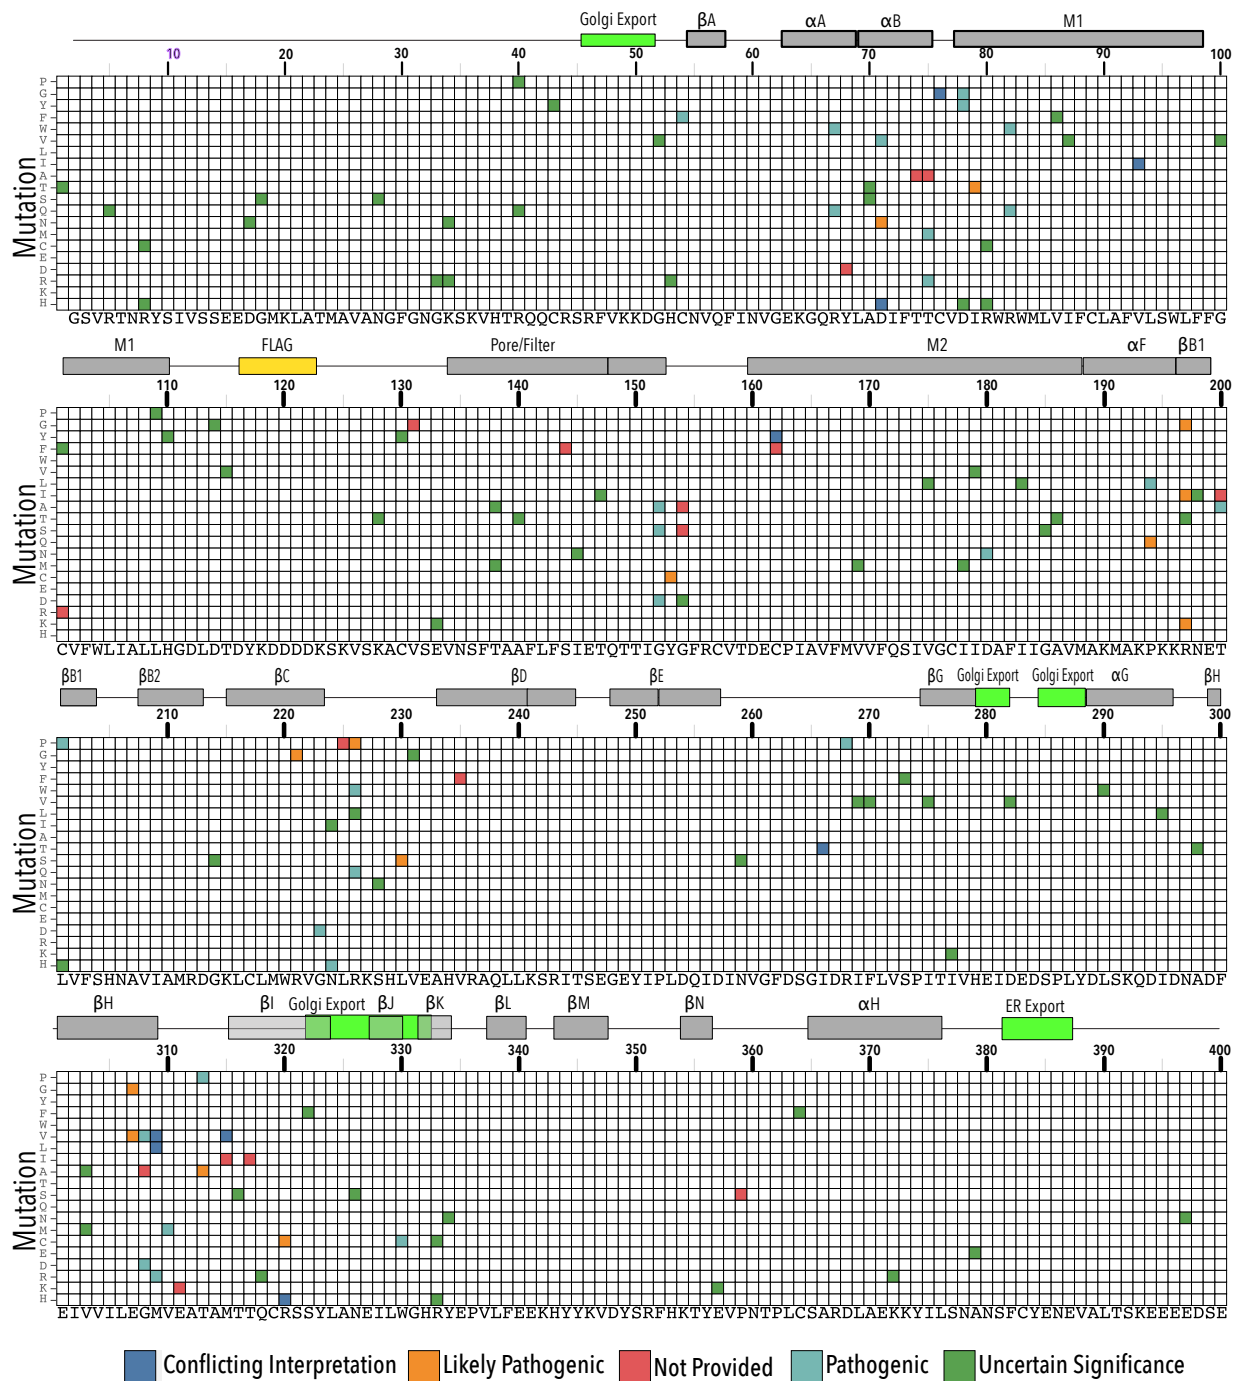

**Supplementary Figure 1: Kir2.1 variant effect reported in ClinVar.** Heatmap showing clinically observed Kir2.1 variants mapped by position, mutation, and pathogenicity interpretation. Kir2.1 secondary structural element are shown as gray boxes above each panel. Trafficking signals are colored green.

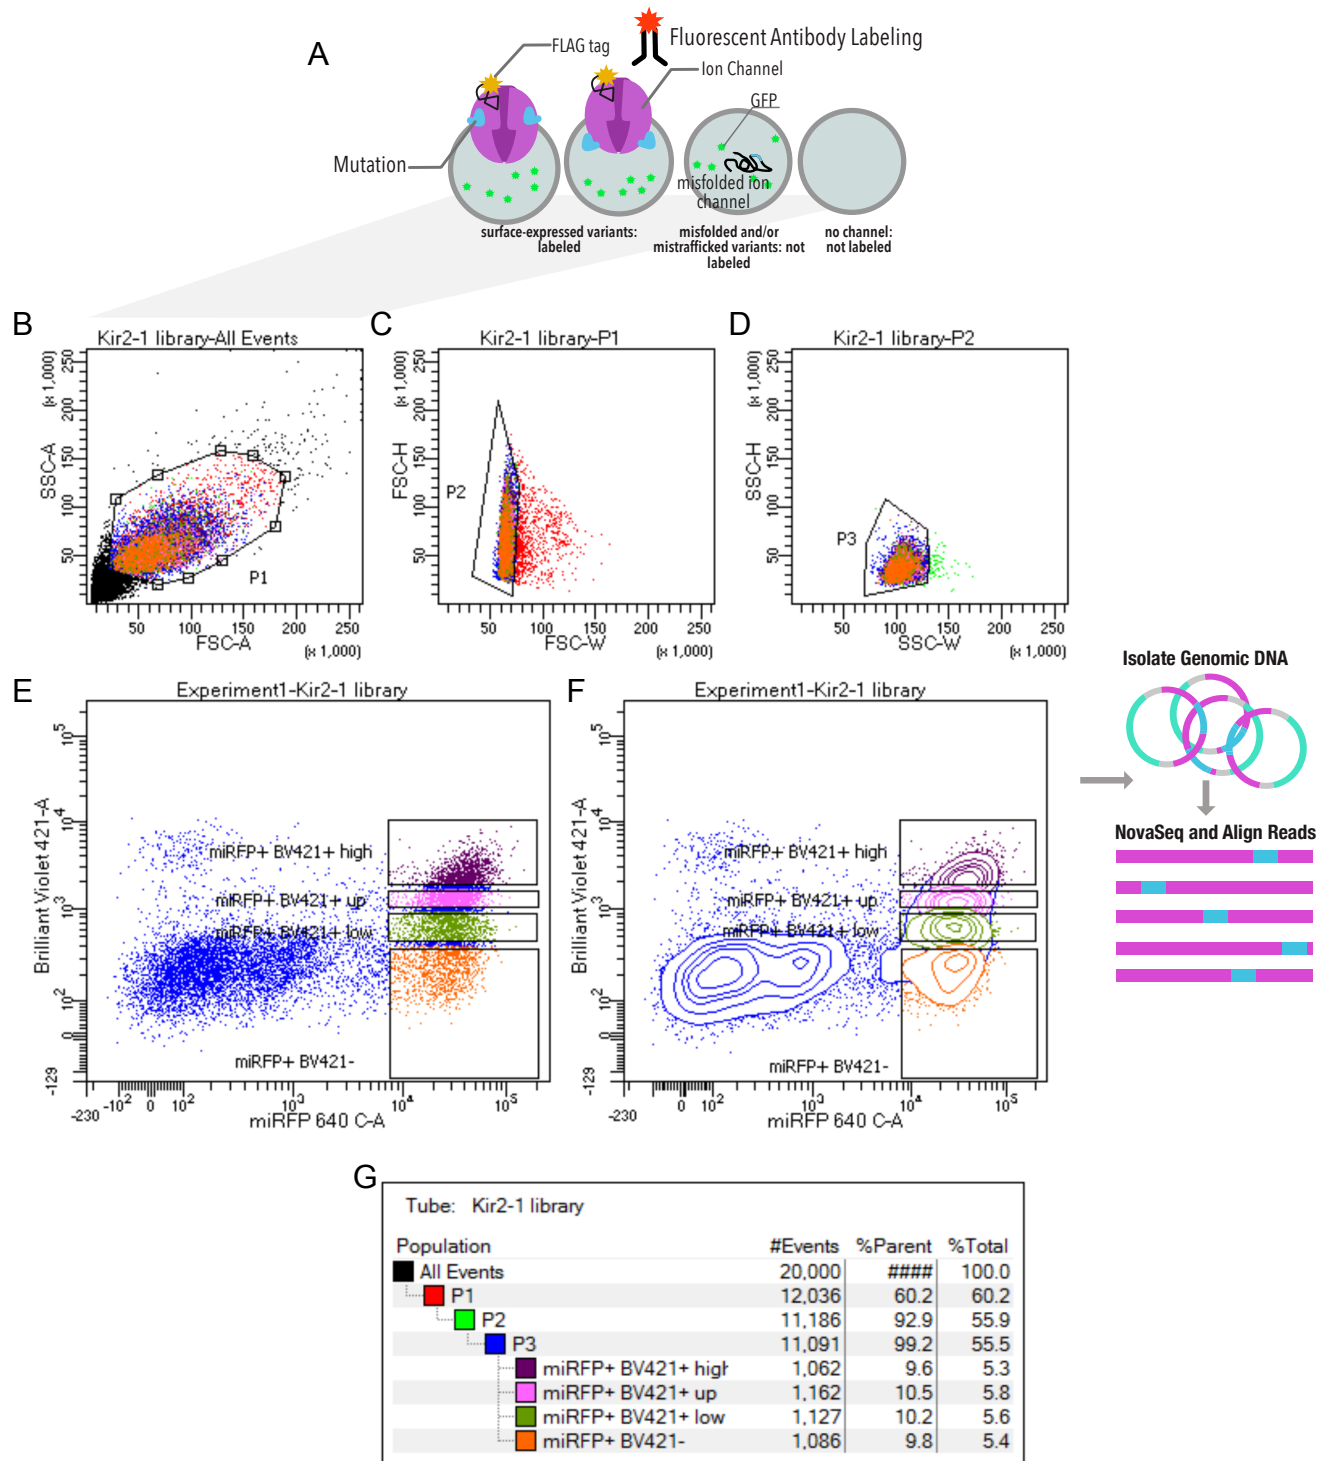

**Supplementary Figure 2: Kir2.1 surface expression assay gating scheme. (A)** HEK293 cells expressing a single variant are incubated with a fluorescent (Brilliant Violet) antibody that recognizes a FLAG tag inserted into an extracellular loop (Kir2.1 position T115). Cells expressing channel variants that can fold, assemble and traffic to the cell surface are labelled, while those that express variants with impaired folding, assembly, and/or trafficking are not labelled. **(B)** Using FACS, whole HEK293 cells are gated on side (SSC-A) and forward scattering (FSC-A). **(C-D)** Forward scattering height (FSC-H), forward scattering width (FSC-W), and Side scattering width (SSC-W) are used to gate single cells. Non-surface expressed variants (miRFP<sub>high</sub>/Label<sub>low</sub>) and surface expressed variants (miRFP<sub>high</sub>/Label<sub>high</sub>) populations are gated into 'negative', 'low', 'up', and 'high' populations based an expression marker (miRFP670) of Anti-Flag Brilliant Violet-421 fluorescence. Scatter plot **(E)** and contour plot **(F)** shown. Contour plots represent 95% confidence intervals with outliers shown as dots. **(G)** Sort statistic for each gated cell population.

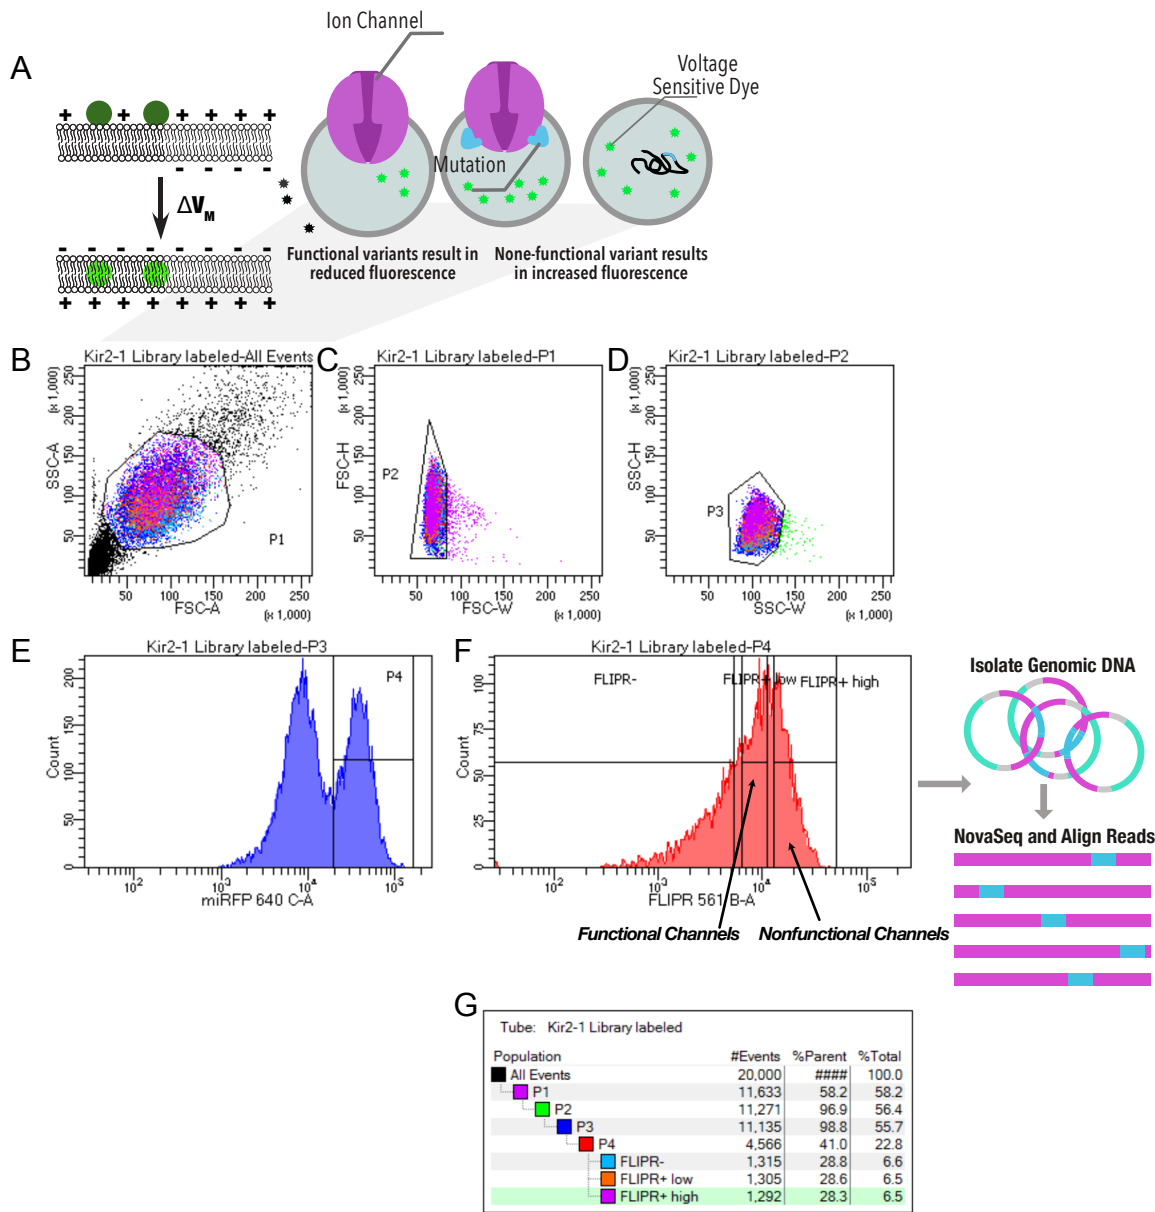

**Supplementary Figure 3: Kir2.1 functional fitness assay gating scheme. (A)** HEK293 cells expressing a single variant are incubated with a voltage-sensitive FLIPR dye. In strongly hyperpolarized cells, this dye partitions out the cell membrane into an aqueous environment, which decreases its extinction coefficient and thus decreases green fluorescence upon excitation with blue light. In depolarized cells, the FLIPR dye fluorescence is brighter because the dye partitions into the membrane, which increases its extinction coefficient. **(B)** Using FACS, whole HEK293 cells are gated on side (SSC-A) and forward scattering (FSC-A). **(C-D)** Forward scattering height (FSC-H), forward scattering width (FSC-W), and Side scattering width (SSC-W) are used to gate single cells. **(E)** Cells are further gated using miRFP670 as an expression marker. **(F)** Non-functional and functional channel population are separated by sorting based on FLIPR fluorescences. **(G)** Sort statistic for each gated cell population.

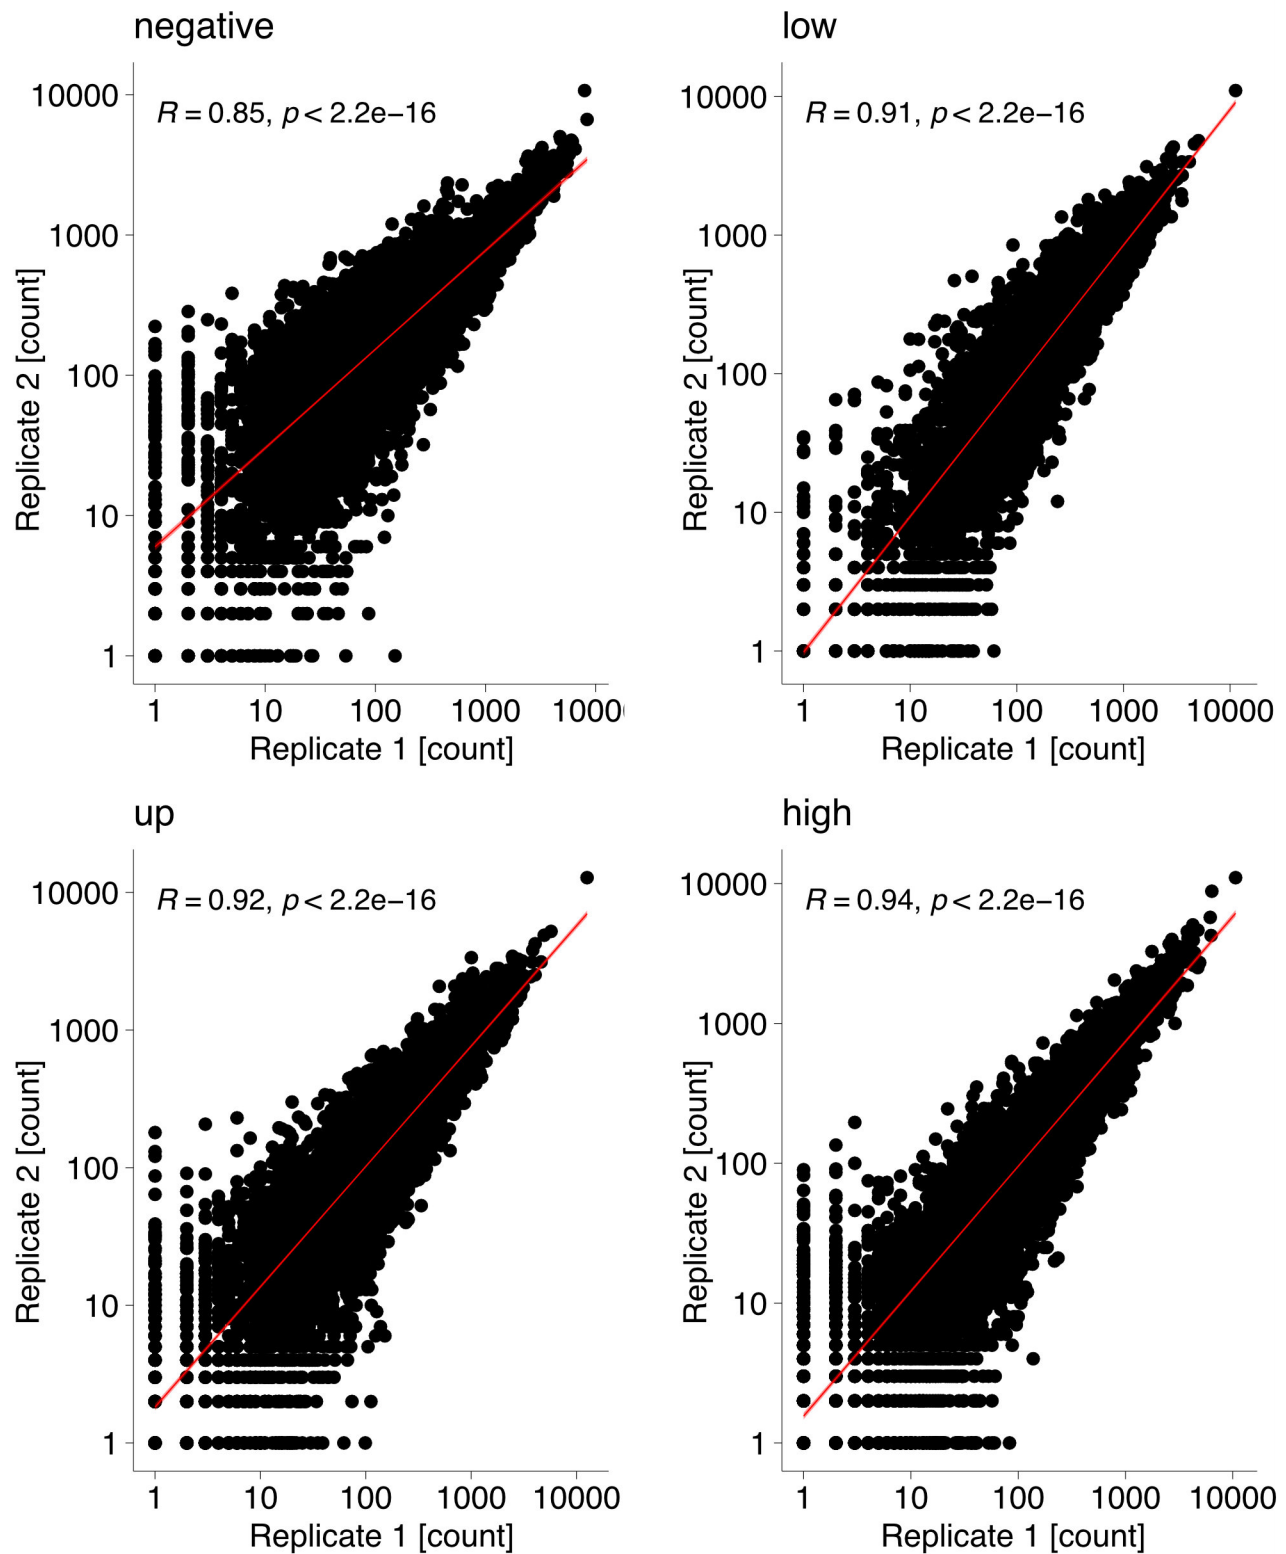

**Supplementary Figure 4: Surface fitness assay biological replicates.** Scatterplots show mapped read counts for each Kir2.1 variant in each replicate for different assay subpools. Spearman correlation coefficients are inset for each replicate pair. A linear model regression fit is shown as a red line.



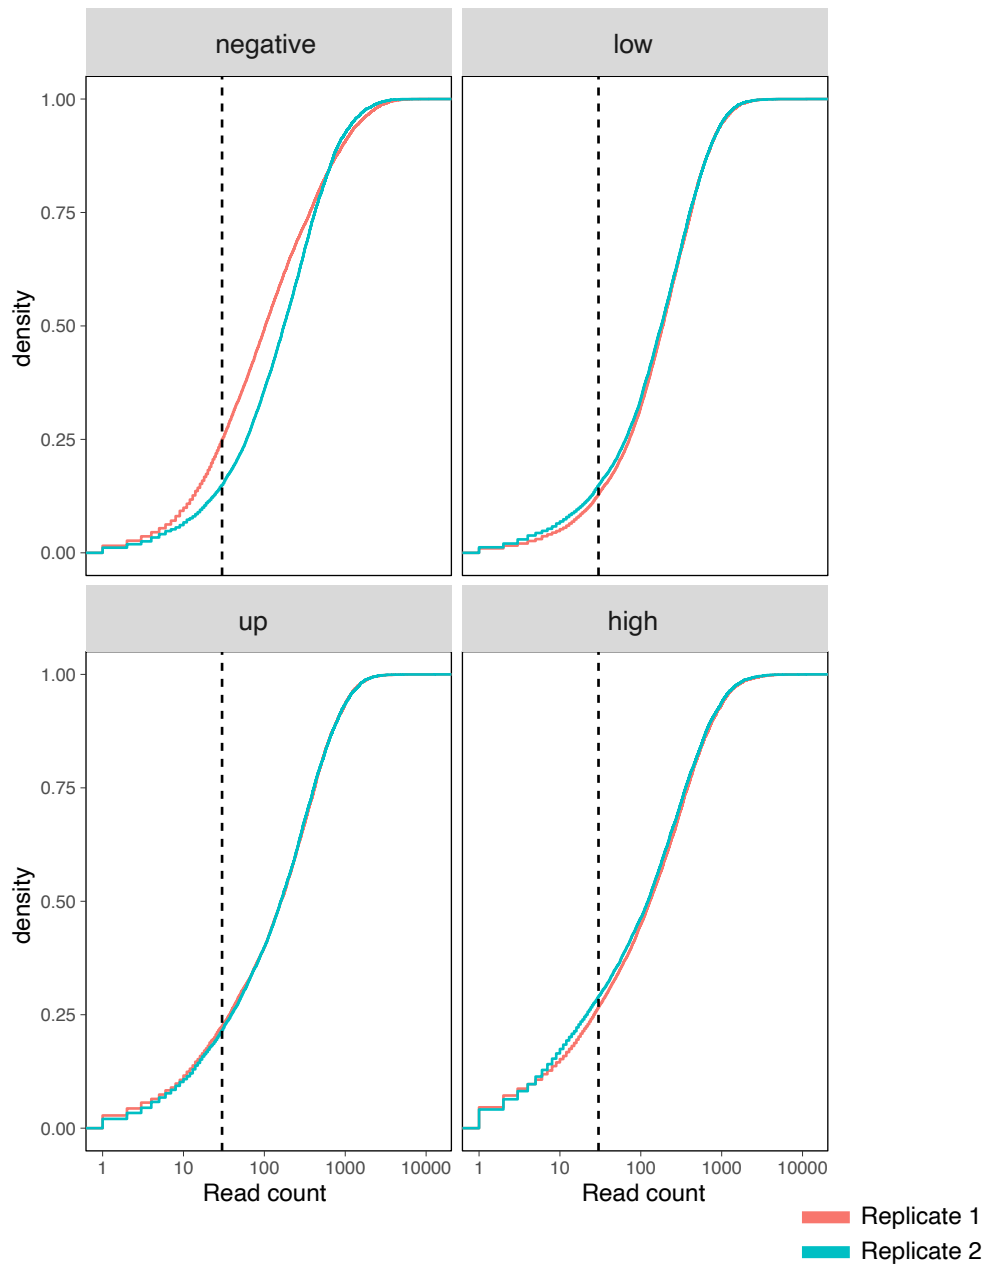

**Supplementary Figure 5: Surface fitness assay read count depth.** Cumulative density distribution of read counts for each replicate and assay condition subpool. Dashed vertical lines represent 30-fold coverage.

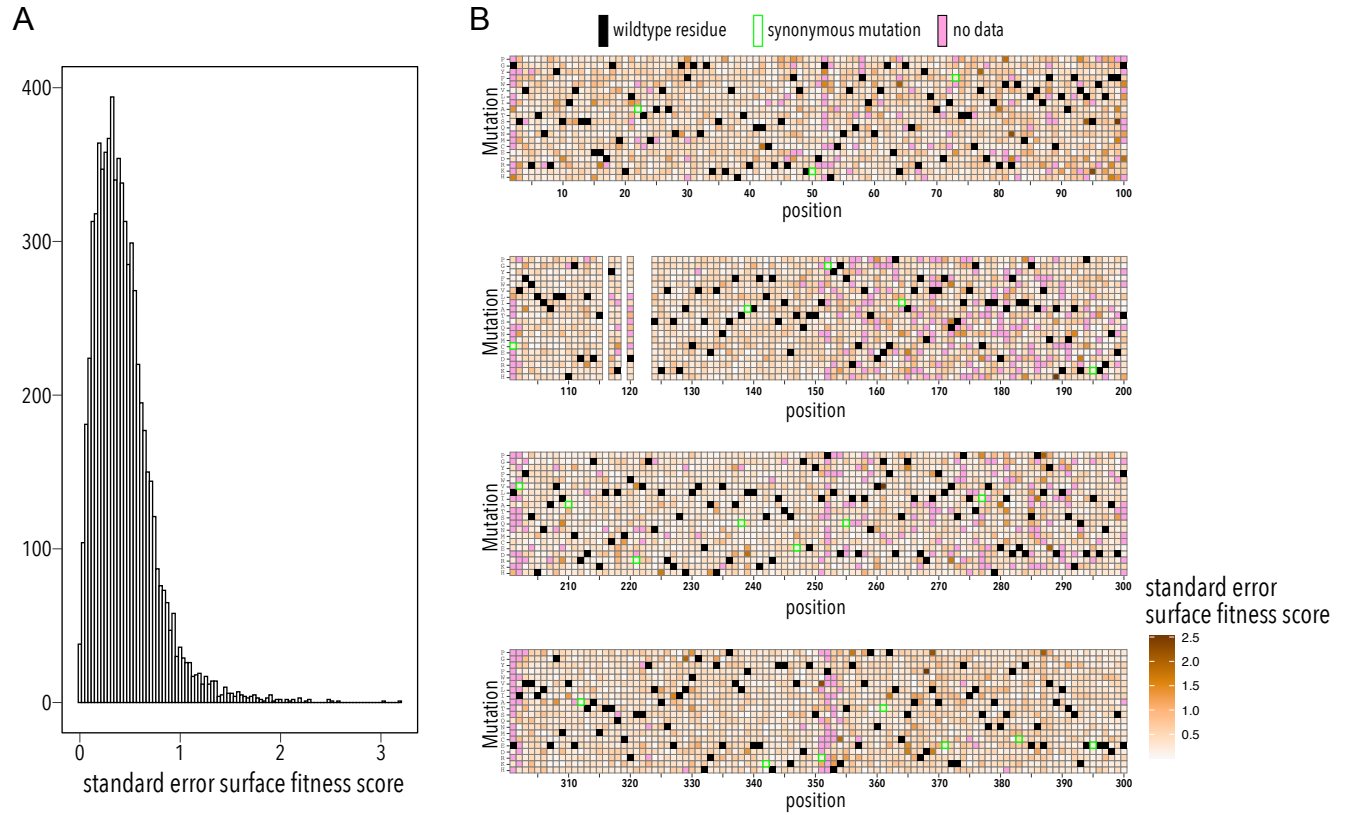

**Supplementary Figure 6: Surface fitness assay standard error distribution. (A)** Distribution of surface fitness score standard errors. **(B)** Heatmap showing surface fitness standard error (gradient white to brown) mapped to each position and mutation. Wildtype residues are shown as black boxes. Missing data is shown as magenta boxes. Synonymous mutations are indicated by a green outline.

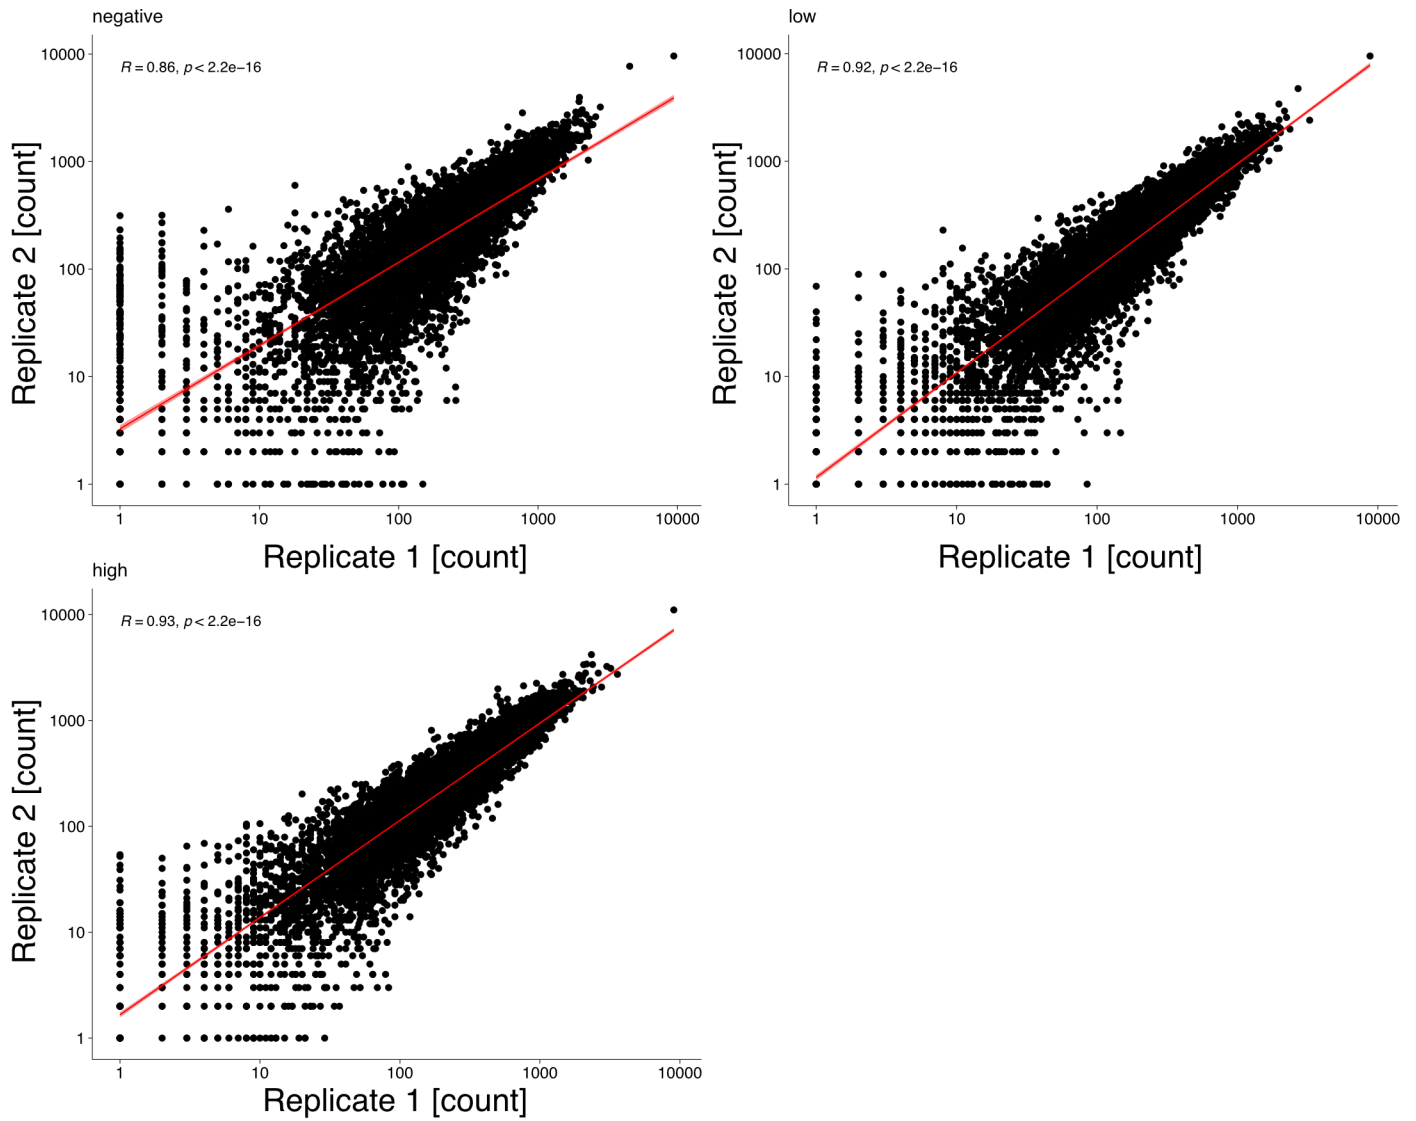

**Supplementary Figure 7: Surface fitness assay biological replicates.** Scatterplots show mapped read counts for each Kir2.1 variant in each replicate for different assay subpools. Spearman correlation coefficients are inset for each replicate pair. A linear model regression fit is shown as a red line.

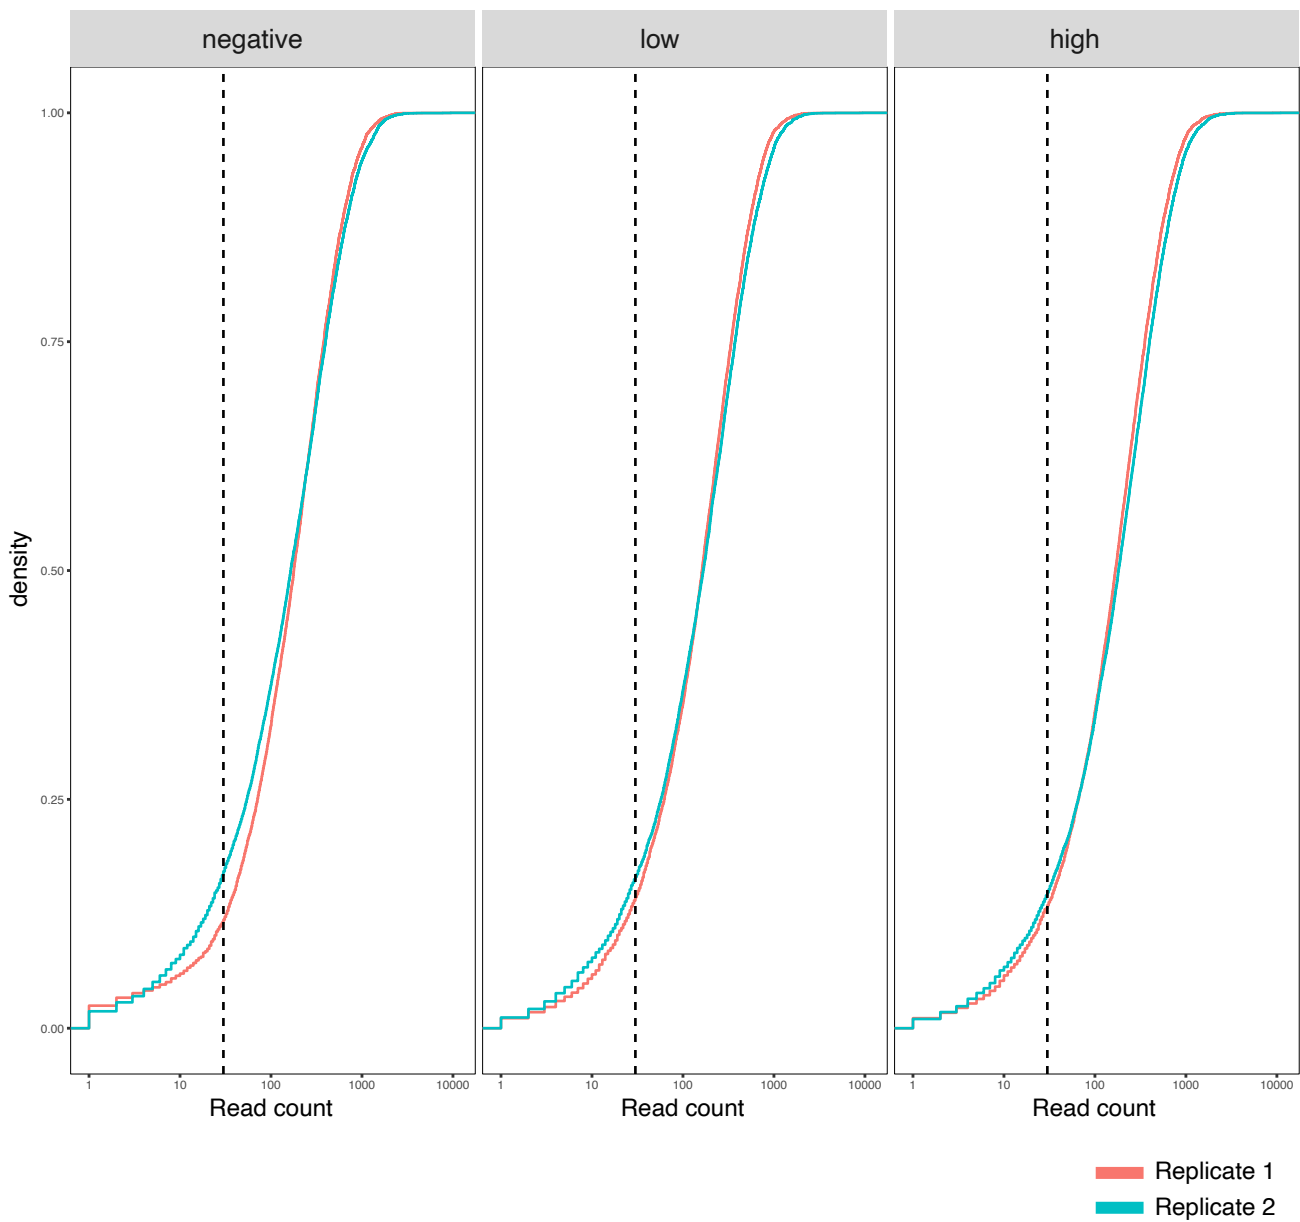

**Supplementary Figure 8: Surface fitness assay biological replicates.** Cumulative density distribution of read counts for each replicate and assay condition subpool. Dashed vertical lines represent 30-fold coverage.

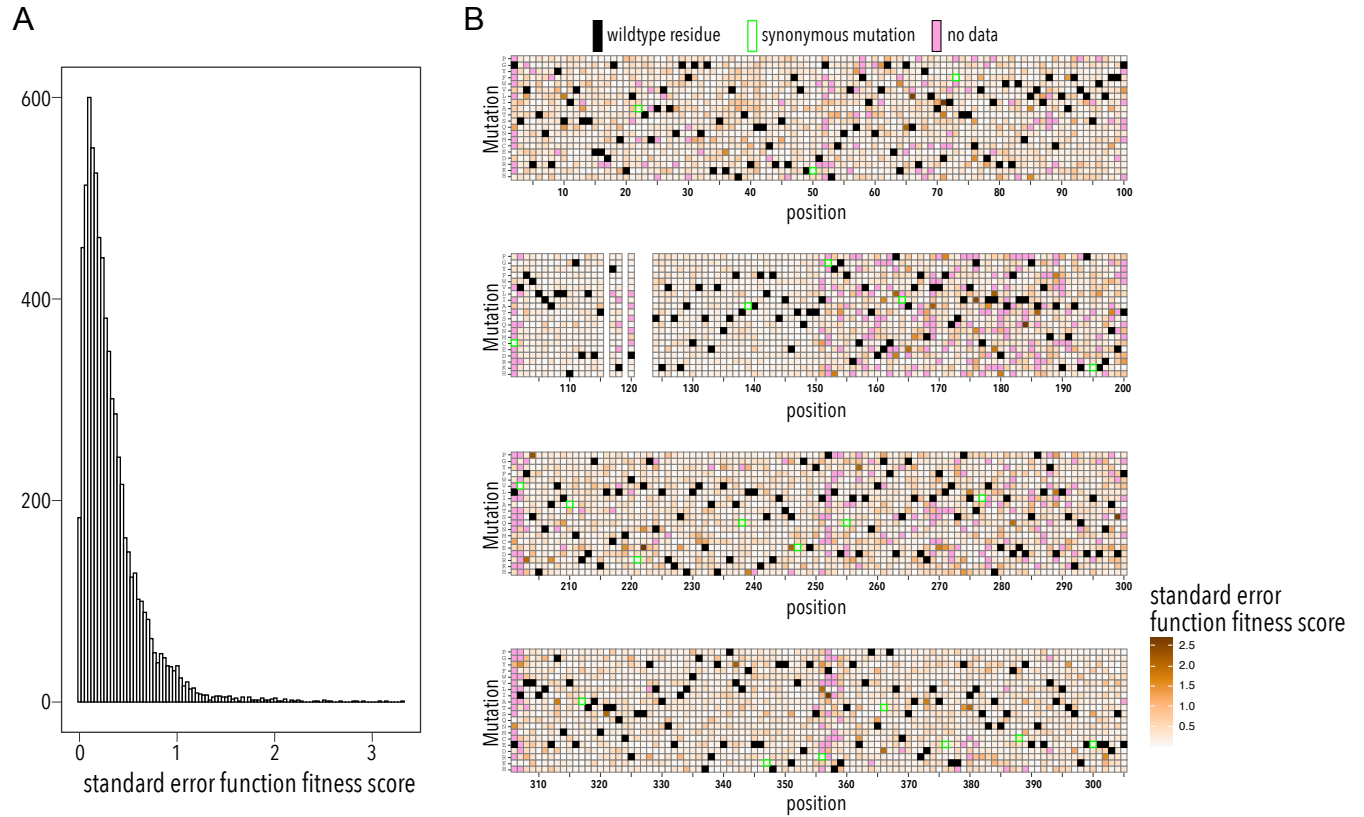

**Supplementary Figure 9: Function fitness assay standard error distribution. (A)** Distribution of surface fitness score standard errors. **(B)** Heatmap showing surface fitness standard error (gradient white to brown) mapped to each position and mutation. Wildtype residues are shown as black boxes. Missing data is shown as magenta boxes. Synonymous mutations are indicated by a green outline.

A

| Sample             | Barcode sequence  | PF Clusters | % of the lane | % Perfect barcode | % One mismatch barcode | Yield (Mbases) | % PF Clusters | % $\geq$ Q30 bases | Mean Quality Score |
|--------------------|-------------------|-------------|---------------|-------------------|------------------------|----------------|---------------|--------------------|--------------------|
| dms_baseline       | CGTACTAG+AGAGGATA | 17,942,041  | 1.78          | 95.35             | 4.65                   | 5,418          | 100           | 90.5               | 35.34              |
| dms_function_high1 | GTAGAGGA+ATAGAGAG | 14,044,823  | 1.39          | 95.15             | 4.85                   | 4,242          | 100           | 87.22              | 34.64              |
| dms_function_high2 | TAAGGCGA+AGAGGATA | 18,810,378  | 1.86          | 96.5              | 3.5                    | 5,681          | 100           | 89.08              | 35.01              |
| dms_function_low1  | CGAGGCTG+ATAGAGAG | 14,199,546  | 1.41          | 97.46             | 2.54                   | 4,288          | 100           | 88.63              | 34.99              |
| dms_function_low2  | GGAGCTAC+ATAGAGAG | 14,903,201  | 1.48          | 95.74             | 4.26                   | 4,501          | 100           | 89.28              | 35.1               |
| dms_function_neg1  | TAGGCATG+ATAGAGAG | 15,073,953  | 1.49          | 97.14             | 2.86                   | 4,552          | 100           | 91.1               | 35.45              |
| dms_function_neg2  | ACTCGCTA+ATAGAGAG | 16,560,022  | 1.64          | 95.44             | 4.56                   | 5,001          | 100           | 89.56              | 35.14              |
| dms_surface_high1  | TCCTGAGC+ATAGAGAG | 15,200,690  | 1.51          | 96.22             | 3.78                   | 4,591          | 100           | 90.8               | 35.37              |
| dms_surface_high2  | TAGGCATG+AGAGGATA | 14,882,582  | 1.47          | 97.33             | 2.67                   | 4,495          | 100           | 90.87              | 35.4               |
| dms_surface_low1   | CGTACTAG+ATAGAGAG | 16,320,952  | 1.62          | 93.92             | 6.08                   | 4,929          | 100           | 88.75              | 34.98              |
| dms_surface_low2   | TCCTGAGC+AGAGGATA | 17,274,356  | 1.71          | 97.2              | 2.8                    | 5,217          | 100           | 90.98              | 35.42              |
| dms_surface_neg1   | TAAGGCGA+ATAGAGAG | 18,343,213  | 1.82          | 94.16             | 5.84                   | 5,540          | 100           | 87.59              | 34.73              |
| dms_surface_neg2   | AGGCAGAA+AGAGGATA | 20,844,383  | 2.07          | 96.24             | 3.76                   | 6,295          | 100           | 90.49              | 35.31              |
| dms_surface_up1    | AGGCAGAA+ATAGAGAG | 16,105,434  | 1.6           | 94.92             | 5.08                   | 4,864          | 100           | 89.01              | 35.01              |
| dms_surface_up2    | GGACTCCT+AGAGGATA | 16,752,187  | 1.66          | 97.54             | 2.46                   | 5,059          | 100           | 90.65              | 35.36              |

B

### Surface Fitness Assay – Mapped Reads

|                       | Negative |        | Low    |        | Up     |        | High   |        |
|-----------------------|----------|--------|--------|--------|--------|--------|--------|--------|
|                       | Rep. 1   | Rep. 2 | Rep. 1 | Rep. 2 | Rep. 1 | Rep. 2 | Rep. 1 | Rep. 2 |
| $N_{\text{variants}}$ | 7,282    | 7,282  | 7,305  | 7,305  | 7,175  | 7,175  | 6,975  | 6,975  |
| median                | 103      | 174    | 187    | 179    | 160.5  | 160    | 130    | 123    |
| mean                  | 342.3    | 344.6  | 315.5  | 307.4  | 310.4  | 309.5  | 301.4  | 285.5  |
| >30-fold [%]          | 71.7     | 82.4   | 85.4   | 82.2   | 73.4   | 73.4   | 65.7   | 64.4   |

C

### Function Fitness Assay – Mapped Reads

|              | Negative |        | Low    |        | Up     |        |
|--------------|----------|--------|--------|--------|--------|--------|
|              | Rep. 1   | Rep. 2 | Rep. 1 | Rep. 2 | Rep. 1 | Rep. 2 |
| N            | 7,168    | 7,168  | 7,284  | 7,284  | 7,320  | 7,320  |
| median       | 178      | 165    | 162    | 167    | 168    | 182    |
| mean         | 281.6    | 297.1  | 248.5  | 276.5  | 261.5  | 295.7  |
| >30-fold [%] | 79.4     | 79.5   | 82.7   | 80.9   | 83.3   | 83.5   |

**Supplementary Table 1: NGS read statistics and assay repeatability.** (A) Read statistics for each sequenced variant pool. Mapped reads for each replicate and surface fitness assay sub-pool (B) or function fitness assay (C).  $N_{\text{variants}}$  represented in each replicate (out of 7,429 total), median read count per variant, mean read count per variant, and percentage of variants that have greater than 30-fold reach coverage.



















|        |     |     |       |   |   |    |    |            |            |           |            |            |           |             |       |
|--------|-----|-----|-------|---|---|----|----|------------|------------|-----------|------------|------------|-----------|-------------|-------|
| KCNJ2  | 309 | 301 | TRUE  | M | V | NP | NP | -0.6693282 | 0.19420483 | 2.02E-07  | 0.01573106 | 0.40628209 | 2.02E-98  | Conflicting | lof_f |
| KCNJ2  | 315 | 307 | TRUE  | M | I | NP | NP | -0.7175479 | 0.09290881 | 1.99E-34  | -0.481593  | 0.12160307 | 1.38E-33  | VUS         | lof_f |
| KCNJ8  | 57  | 46  | TRUE  | Q | V | P  | NP | NA         | NA         | NA        | NA         | 0.39448643 | 6.34E-68  | VUS         | NA    |
| KCNJ2  | 71  | 71  | TRUE  | D | V | C  | NP | 1.00340855 | 0.85017164 | 2.22E-16  | -1.0252169 | 0.2968519  | 4.06E-74  | Pathog.     | NA    |
| KCNJ2  | 85  | 85  | TRUE  | L | V | NP | NP | 0.27657576 | 0.36230995 | 6.49E-14  | -0.6348007 | 0.30310343 | 0         | NA          | NA    |
| KCNJ2  | 87  | 87  | TRUE  | I | V | NP | NP | 0.14704835 | 0.09265711 | 3.92E-33  | 0.12908661 | 0.43399975 | 1.11E-16  | VUS         | NA    |
| KCNJ2  | 91  | 91  | TRUE  | A | V | NP | NP | 0.4535043  | 0.06087486 | 3.92E-36  | 0.24243356 | 0.57248274 | 1.32E-65  | NA          | NA    |
| KCNJ2  | 98  | 98  | TRUE  | F | V | A  | NP | 0.48549801 | 0.42873784 | 0         | -0.3763099 | 0.386465   | 0         | NA          | NA    |
| KCNJ11 | 186 | 166 | TRUE  | A | W | NP | A  | -0.8453095 | 0.62411791 | 1.11E-16  | 0.32397819 | 0.19439502 | 0         | Pathog.     | NA    |
| KCNJ10 | 19  | 18  | FALSE | M | W | NP | A  | 0.12648476 | 0.06042266 | 4.36E-05  | -2.0238281 | 0.28166805 | 3.15E-83  | VUS         | NA    |
| KCNJ10 | 193 | 171 | TRUE  | K | W | C  | A  | 0.13171266 | 0.27994746 | 3.00E-10  | -0.2004754 | 0.84091396 | 0         | VUS         | NA    |
| KCNJ13 | 193 | 162 | TRUE  | K | W | C  | A  | 0.13171266 | 0.27994746 | 3.00E-10  | -0.2004754 | 0.84091396 | 0         | Pathog.     | NA    |
| KCNJ5  | 212 | 211 | TRUE  | R | W | C  | A  | 0.27986015 | 0.278617   | 0         | -0.0793948 | 0.24729635 | 1.04E-09  | VUS         | NA    |
| KCNJ5  | 221 | 220 | TRUE  | R | W | C  | A  | -0.4560462 | 0.10802933 | 3.39E-11  | -1.94495   | 0.3794728  | 1.40E-67  | VUS         | NA    |
| KCNJ2  | 226 | 218 | TRUE  | R | W | C  | A  | 0.19756449 | 0.55813353 | 0         | -0.1926924 | 0.26260942 | 9.19E-13  | Pathog.     | NA    |
| KCNJ5  | 236 | 235 | TRUE  | R | W | C  | A  | -0.0787073 | 0.78303552 | 0.0008113 | 0.29973448 | 0.10473114 | 0         | VUS         | NA    |
| KCNJ5  | 243 | 242 | TRUE  | R | W | C  | A  | NA         | 0.6317913  | 3.78E-117 | NA         | NA         | NA        | VUS         | NA    |
| KCNJ10 | 252 | 230 | TRUE  | P | W | NP | A  | -0.1815275 | 0.29840475 | 9.92E-08  | 5.03654636 | 0.40913285 | 0         | VUS         | NA    |
| KCNJ2  | 290 | 282 | TRUE  | L | W | NP | A  | 0.98491073 | 0.40905832 | 2.98E-20  | 0.61974861 | 0.39075808 | 1.68E-33  | VUS         | NA    |
| KCNJ1  | 3   | 6   | FALSE | S | W | P  | A  | -0.7700401 | 0.76472234 | 4.44E-16  | -4.5934661 | 0.8304699  | 0         | VUS         | NA    |
| KCNJ11 | 43  | 31  | TRUE  | C | W | P  | A  | -0.2069305 | 0.22551873 | 2.21E-40  | -2.5670829 | 0.40805221 | 1.67E-16  | VUS         | NA    |
| KCNJ10 | 44  | 27  | TRUE  | R | W | C  | A  | 0.11121399 | 0.09370754 | 8.67E-18  | 0.44337584 | 0.05443669 | 9.52E-06  | VUS         | NA    |
| KCNJ2  | 67  | 67  | TRUE  | R | W | C  | A  | -0.451578  | 0.11157025 | 5.46E-08  | -0.5923685 | 0.07908518 | 8.54E-16  | Pathog.     | NA    |
| KCNJ5  | 67  | 72  | TRUE  | R | W | C  | A  | -0.451578  | 0.11157025 | 5.46E-08  | -0.5923685 | 0.07908518 | 8.54E-16  | VUS         | NA    |
| KCNJ2  | 82  | 82  | TRUE  | R | W | C  | A  | 0.05653513 | 0.10582424 | 1.63E-65  | 0.91338758 | 0.57536506 | 0         | Pathog.     | NA    |
| KCNJ2  | 315 | 307 | TRUE  | M | V | NP | NP | -0.5209843 | 0.01909854 | 8.04E-06  | -0.0590375 | 0.32528496 | 2.84E-144 | Conflicting | lof_f |
| KCNJ2  | 320 | 312 | TRUE  | R | H | C  | C  | -1.0766496 | 0.23778485 | 0         | 0.36217952 | 0.28633596 | 2.79E-05  | Conflicting | lof_f |
| KCNJ1  | 130 | 121 | TRUE  | C | Y | P  | A  | -0.5721161 | 0.30153904 | 0         | -1.393564  | 0.30187403 | 1.92E-34  | VUS         | NA    |
| KCNJ2  | 322 | 314 | TRUE  | S | F | P  | A  | 0.00762798 | 0.52934667 | 0         | -5.6902336 | 0.94147175 | 4.44E-16  | VUS         | lof_s |
| KCNJ2  | 334 | 326 | TRUE  | Y | N | A  | P  | -0.2505895 | 0.25987178 | 2.78E-17  | -2.6558446 | 0.11581231 | 3.01E-43  | VUS         | lof_s |
| KCNJ2  | 357 | 349 | TRUE  | E | K | C  | C  | 0.18102372 | 0.08803897 | 4.70E-08  | -1.3287225 | 0.26255468 | 2.08E-109 | VUS         | lof_s |
| KCNJ10 | 182 | 160 | TRUE  | F | Y | A  | A  | 0.28509142 | 0.33906686 | 0         | -0.273535  | 0.15651211 | 2.08E-17  | VUS         | NA    |
| KCNJ11 | 186 | 166 | TRUE  | A | Y | NP | A  | NA         | 0.02221711 | 6.47E-64  | NA         | 1.02236761 | 4.86E-89  | Pathog.     | NA    |
| KCNJ2  | 254 | 246 | TRUE  | D | Y | C  | A  | -1.1908554 | 0.522666   | 0         | 0.39607077 | 0.2609136  | 0         | NA          | NA    |
| KCNJ1  | 27  | 30  | FALSE | A | Y | NP | A  | 0.37204555 | 0.88879096 | 0         | -0.7394914 | 0.84563894 | 1.78E-116 | VUS         | NA    |
| KCNJ13 | 270 | 236 | TRUE  | F | Y | A  | A  | 0.25348327 | 0.43131981 | 1.11E-16  | -0.7705225 | 0.15576727 | 2.18E-38  | VUS         | NA    |
| KCNJ2  | 297 | 289 | TRUE  | N | Y | P  | A  | 0.53498714 | 0.44835728 | 1.11E-16  | -0.6996906 | 0.09562638 | 4.59E-10  | NA          | NA    |
| KCNJ2  | 326 | 318 | TRUE  | N | Y | P  | A  | 0.32799972 | 0.07318408 | 7.27E-46  | 0.01572495 | 0.30684738 | 5.43E-112 | NA          | NA    |
| KCNJ11 | 346 | 327 | TRUE  | K | Y | C  | A  | 0.05951968 | 0.11161787 | 2.79E-36  | -1.5363827 | 0.68051062 | 8.82E-222 | VUS         | NA    |
| KCNJ2  | 38  | 38  | TRUE  | H | Y | C  | A  | -0.4344452 | 0.99418305 | 0         | -1.9377759 | 0.48055852 | 0         | NA          | NA    |
| KCNJ2  | 43  | 43  | TRUE  | C | Y | P  | A  | -0.0557136 | 0.12115544 | 0         | 0.91054931 | 0.22182247 | 0         | VUS         | NA    |
| KCNJ11 | 73  | 60  | TRUE  | F | Y | A  | A  | 0.05992666 | 0.20735178 | 0         | -0.3808293 | 0.09432038 | 1.50E-44  | Pathog.     | NA    |
| KCNJ2  | 78  | 78  | TRUE  | D | Y | C  | A  | -0.3850291 | 0.10987519 | 2.34E-59  | -0.5878599 | 0.33285326 | 3.69E-55  | Pathog.     | NA    |

### Supplemental Table 3: Primers used in study.

>Landing\_pad\_genome\_amplification\_for  
GGAGCAATTCCACAACACTTTTGTGTC  
Landing\_pad\_genome\_amplification\_rev  
TTGGTCCTGGATTTTCCTCCACATCACC

>Library\_swap\_to\_landing\_bsmbi\_for  
acgacCGTCTCcccgtcagatccgGCCACC  
>Library\_swap\_to\_landing\_bsmbi\_rev  
agacaCGTCTCcctgtacagctcgtccatgcc

>backbone\_swap\_to\_landing\_bsmbi\_for  
cacagCGTCTCccaagagcggagctactaacttcagc  
>backbone\_swap\_to\_landing\_bsmbi\_rev  
acagcCGTCTCcacggggtggcgtgtagttgcgg

>Kir\_geneP\_Mut-1\_R Frag2-51 55.8C  
ATACGTCTCCCATGGTGGCcggatc  
>Kir\_geneP\_Mut-1\_F Frag2-51 57.7C  
ATACGTCTCTGGCCACTGTAATGTGCAGTT

>Kir\_geneP\_Mut-2\_R Frag52-101 61.5C  
ATACGTCTCCATCTTTCTTGACAAAGCGTGACC  
>Kir\_geneP\_Mut-2\_F Frag52-101 59.7C  
ATACGTCTCCGTTTTTTGGTTGATCGCTTTGTTG

>Kir\_geneP\_Mut-3\_R Frag102-151 59.5C  
ATACGTCTCCGCAGCCAAAGAAGAGCCA  
>Kir\_geneP\_Mut-3\_F Frag102-151 59.3C  
ATACGTCTCCGGATACGGGTTCCGATGC

>Kir\_geneP\_Mut-4\_R Frag152-201 59.0C  
ATACGTCTCCGATAGTGGTTTGTGTTTCGA  
>Kir\_geneP\_Mut-4\_F Frag152-201 59.1C  
ATACGTCTCGGTTTTTCAGTCACAACGCTGTG

>Kir\_geneP\_Mut-5\_R Frag202-251 59.5C  
ATACGTCTCCCAATGTCTCATTCTTTTTTTGGGCT



>Kir\_geneP\_Mut-5\_F Frag202-251 59.5C  
ATACGTCTCACCACTCGATCAGATTGATATCAATGTG

>Kir\_geneP\_Mut-6\_R Frag252-301 62.0C  
ATACGTCTCGTATGTACTCTCCTTCTGAAGTTATGCG

>Kir\_geneP\_Mut-6\_F Frag252-301 57.5C  
ATACGTCTCAATTGTCGTTATACTGGAAGGGATG

>Kir\_geneP\_Mut-7\_R Frag302-351 61.1C  
ATACGTCTCTTTTCGAAATCAGCGTTGTCGATGT

>Kir\_geneP\_Mut-7\_F Frag302-351 59.1C  
ATACGTCTCGTTCCACAAAACATACGAAGTTCCT

>Kir\_geneP\_Mut-8\_R Frag352-401 59.5C  
ATACGTCTCACCTAGAGTAGTCGACCTTATAATAGT

>Kir\_geneP\_Mut-8\_F Frag352-401 58.6C  
ATACGTCTCCGGAGTCCCGAGTCAACC

>Kir\_oligoP\_Mut-1\_F Frag2-51\_58.6C  
TTGGTCATGTGCTTTTCGTTGG

>Kir\_oligoP\_Mut-1\_R Frag2-51\_56.7C  
ATACTCAGAATCGATTCCCCG

>Kir\_oligoP\_Mut-2\_F Frag52-101\_57.0C  
TCCGACGGGGAGTATATACTC

>Kir\_oligoP\_Mut-2\_R Frag52-101\_58.2C  
TCAGGCCAAAATAATCTCCGTTC

>Kir\_oligoP\_Mut-3\_F Frag102-151\_57.6C  
GTACATGAAACGATGGACGGTAA

>Kir\_oligoP\_Mut-3\_R Frag102-151\_58.8C  
TCCTCAGCGATGATCCTATGC

>Kir\_oligoP\_Mut-4\_F Frag152-201\_56.5C  
GGCGAGAGGAGATATAGAGC

>Kir\_oligoP\_Mut-4\_R Frag152-201\_56.5C  
GCTGTGCACATATATGGTCACA

>Kir\_oligoP\_Mut-5\_F Frag202-251\_56.9C  
TTATAATCATCCTCCCCGGCT

>Kir\_oligoP\_Mut-5\_R Frag202-251\_59.4C

GTGTGCTCGACAGTTGACACTT

>Kir\_oligoP\_Mut-6\_F Frag252-301\_56.7C

AAGTTTGTGGGGTAGGGAATGA

>Kir\_oligoP\_Mut-6\_R Frag252-301\_56.5C

ACCTTTGCTAGGGAGCATAAG

>Kir\_oligoP\_Mut-7\_F Frag302-351\_56.5C

TGTCAGGGGTAGTGTAACACTAA

>Kir\_oligoP\_Mut-7\_R Frag302-351\_58.7C

AAATCGCTTCTAGGCAAGTTTATTG

>Kir\_oligoP\_Mut-8\_F Frag352-401\_56.3C

AGACCAGGATGGCTGATAAGT

>Kir\_oligoP\_Mut-8\_R Frag352-401\_56.6C

ACATATACCATCTAAACCACGACC
